# Supplementary material for: The Effect of Rider:Horse Bodyweight Ratio on the Superficial Body Temperature of Horse’s Thoracolumbar Region Evaluated by Advanced Thermal Image Processing
Source: MDPI journal article supplement (doi:10.3390/ani12020195), 2022-01-13
Supplement: s1 [file s1]

# The Effect of Rider:Horse Bodyweight Ratio on the Superficial Body Temperature of Horse's Thoracolumbar Region Evaluated by Advanced Thermal Image Processing

Małgorzata Domino <sup>1</sup>, Marta Borowska <sup>2</sup>, Anna Trojakowska <sup>3</sup>, Natalia Kozłowska <sup>1</sup>, Łukasz Zdrojkowski <sup>1,\*</sup>, Tomasz Jasiński <sup>1</sup> Graham Smyth<sup>4</sup>, and Małgorzata Maśko <sup>5,\*</sup>

<sup>1</sup> Department of Large Animal Diseases and Clinic, Institute of Veterinary Medicine, Warsaw University of Life Sciences (WULS-SGGW), Warsaw, 02-787, Poland; malgorzata\_domino@sggw.edu.pl (M.D.); natalia\_kozlowska@sggw.edu.pl (N.K.); tomasz\_jasinski@sggw.edu.pl (T.J.)

<sup>2</sup> Institute of Biomedical Engineering, Faculty of Mechanical Engineering, Białystok University of Technology, Białystok, 15-351, Poland; m.borowska@pb.edu.pl (M.B.)

<sup>3</sup> The Scientific Society of Veterinary Medicine Students, Warsaw University of Life Sciences, Warsaw, 02-787, Poland; an.trojakowska@gmail.com (A.T.)

<sup>4</sup> Menzies Health Institute Queensland and Griffith University School of Medicine, Southport, QLD, 4222, Australia; grahamcsmyth@gmail.com (G.S.)

<sup>5</sup> Department of Animal Breeding, Institute of Animal Science, Warsaw University of Life Sciences (WULS-SGGW), Warsaw, 02-787, Poland

\* Correspondence: lukasz\_zdrojkowski@sggw.edu.pl (Ł.Z.); malgorzata\_masko@sggw.edu.pl (M.M.)

**Table S1.** The withers area (ROI 1). Values (mean ± SD) of conventional thermal features in light (L), moderate (M), and heavy (H) groups. The pre-exercise (pre-ex) and post exercise (post-ex) data series were compared. When features differed significantly ( $p < 0.05$ ) for all three groups (L, M, H), the values were marked in bold.

| Groups |         | Taver    | Tmax     | Tmin     |
|--------|---------|----------|----------|----------|
| L      | pre-ex  | 27.5±2.8 | 31.1±2.6 | 24.6±3.2 |
|        | post-ex | 35.7±2.2 | 38.1±2.0 | 32.2±3.0 |
|        | p       | < 0.0001 | < 0.0001 | < 0.0001 |
| M      | pre-ex  | 26.9±3.3 | 31.2±3.5 | 24.0±3.7 |
|        | post-ex | 36.6±2.4 | 39.0±2.2 | 33.1±2.4 |
|        | p       | < 0.0001 | < 0.0001 | < 0.0001 |
| H      | pre-ex  | 26.2±2.8 | 30.3±3.0 | 23.4±3.1 |
|        | post-ex | 36.3±2.1 | 39.1±2.0 | 32.7±3.0 |
|        | p       | < 0.0001 | < 0.0001 | < 0.0001 |

ROI - regions of interest. Taver - the average temperature, Tmax - the maximal temperature, Tmin - the minimal temperature.

**Table S2.** The thoracic spine area (ROI 2). Values (mean ± SD) of conventional thermal features in light (L), moderate (M), and heavy (H) groups. The pre-exercise (pre-ex) and post exercise (post-ex) data series were compared. When features differed significantly ( $p < 0.05$ ) for all three groups (L, M, H), the values were marked in bold.

| Groups |         | Taver    | Tmax     | Tmin     |
|--------|---------|----------|----------|----------|
| L      | pre-ex  | 29.7±2.5 | 33.0±2.3 | 26.5±3.0 |
|        | post-ex | 35.2±2.0 | 37.9±2.0 | 32.1±3.0 |
|        | p       | < 0.0001 | < 0.0001 | < 0.0001 |
| M      | pre-ex  | 29.3±3.0 | 32.5±3.1 | 25.7±3.4 |
|        | post-ex | 35.9±2.7 | 38.5±2.8 | 33.3±2.7 |
|        | p       | < 0.0001 | < 0.0001 | < 0.0001 |
| H      | pre-ex  | 28.6±2.7 | 32.2±3.2 | 25.0±3.0 |
|        | post-ex | 35.8±2.2 | 38.9±2.3 | 32.8±2.7 |
|        | p       | < 0.0001 | < 0.0001 | < 0.0001 |

ROI - regions of interest. Taver - the average temperature, Tmax - the maximal temperature, Tmin - the minimal temperature.

**Table S3.** The left area of back musculature (ROI 3). Values (mean  $\pm$  SD) of conventional thermal features in light (L), moderate (M), and heavy (H) groups. The pre-exercise (pre-ex) and post exercise (post-ex) data series were compared. When features differed significantly ( $p < 0.05$ ) for all three groups (L, M, H), the values were marked in bold.

| Groups |         | Taver                          | Tmax                           | Tmin                           |
|--------|---------|--------------------------------|--------------------------------|--------------------------------|
| L      | pre-ex  | <b>26.6<math>\pm</math>3.0</b> | <b>31.9<math>\pm</math>2.7</b> | <b>22.8<math>\pm</math>3.3</b> |
|        | post-ex | <b>35.2<math>\pm</math>2.5</b> | <b>38.3<math>\pm</math>1.9</b> | <b>30.5<math>\pm</math>3.2</b> |
|        | p       | <b>&lt; 0.0001</b>             | <b>&lt; 0.0001</b>             | <b>&lt; 0.0001</b>             |
| M      | pre-ex  | <b>26.2<math>\pm</math>3.7</b> | <b>31.8<math>\pm</math>3.3</b> | <b>22.4<math>\pm</math>4.4</b> |
|        | post-ex | <b>36.1<math>\pm</math>2.6</b> | <b>39.2<math>\pm</math>2.3</b> | <b>31.9<math>\pm</math>2.8</b> |
|        | p       | <b>&lt; 0.0001</b>             | <b>&lt; 0.0001</b>             | <b>&lt; 0.0001</b>             |
| H      | pre-ex  | <b>25.8<math>\pm</math>3.0</b> | <b>31.7<math>\pm</math>3.2</b> | <b>22.0<math>\pm</math>3.3</b> |
|        | post-ex | <b>35.9<math>\pm</math>2.3</b> | <b>39.3<math>\pm</math>2.1</b> | <b>31.5<math>\pm</math>2.6</b> |
|        | p       | <b>&lt; 0.0001</b>             | <b>&lt; 0.0001</b>             | <b>&lt; 0.0001</b>             |

ROI - regions of interest. Taver - the average temperature, Tmax - the maximal temperature, Tmin - the minimal temperature.

**Table S4.** The right area of back musculature (ROI 4). Values (mean  $\pm$  SD) of conventional thermal features in light (L), moderate (M), and heavy (H) groups. The pre-exercise (pre-ex) and post exercise (post-ex) data series were compared. When features differed significantly ( $p < 0.05$ ) for all three groups (L, M, H), the values were marked in bold.

| Groups |         | Taver                          | Tmax                           | Tmin                           |
|--------|---------|--------------------------------|--------------------------------|--------------------------------|
| L      | pre-ex  | <b>26.9<math>\pm</math>2.9</b> | <b>31.9<math>\pm</math>2.8</b> | <b>23.5<math>\pm</math>3.3</b> |
|        | post-ex | <b>35.2<math>\pm</math>2.5</b> | <b>38.3<math>\pm</math>1.9</b> | <b>31.0<math>\pm</math>3.1</b> |
|        | p       | <b>&lt; 0.0001</b>             | <b>&lt; 0.0001</b>             | <b>&lt; 0.0001</b>             |
| M      | pre-ex  | <b>26.4<math>\pm</math>3.6</b> | <b>32.0<math>\pm</math>3.3</b> | <b>22.8<math>\pm</math>4.1</b> |
|        | post-ex | <b>36.3<math>\pm</math>2.7</b> | <b>38.9<math>\pm</math>2.6</b> | <b>32.1<math>\pm</math>2.9</b> |
|        | p       | <b>&lt; 0.0001</b>             | <b>&lt; 0.0001</b>             | <b>&lt; 0.0001</b>             |
| H      | pre-ex  | <b>26.0<math>\pm</math>3.0</b> | <b>32.1<math>\pm</math>3.4</b> | <b>22.2<math>\pm</math>3.2</b> |
|        | post-ex | <b>36.1<math>\pm</math>2.2</b> | <b>39.7<math>\pm</math>1.8</b> | <b>31.0<math>\pm</math>3.4</b> |
|        | p       | <b>&lt; 0.0001</b>             | <b>&lt; 0.0001</b>             | <b>&lt; 0.0001</b>             |

ROI - regions of interest. Taver - the average temperature, Tmax - the maximal temperature, Tmin - the minimal temperature.

**Table S5.** The withers area (ROI 1). Values (mean  $\pm$  SD) of Histogram Statistics (HS) features for three color components (R, red; G, green; B, blue) in light (L), moderate (M), and heavy (H) groups. The pre-exercise (pre-ex) and post exercise (post-ex) data series were compared. When features differed significantly ( $p < 0.05$ ) for all three groups (L, M, H), the values were marked in bold.

| Groups  |          | Mean    | Variance | Skewness  | Kurtosis  | Perc01    | Perc10   | Perc50   | Perc90   | Perc99   | Maxm01   | Domn01   | Maxm10    | Domn10   |          |          |
|---------|----------|---------|----------|-----------|-----------|-----------|----------|----------|----------|----------|----------|----------|-----------|----------|----------|----------|
| R       | L        | pre-ex  | 25.1±4.3 | 48.8±38.3 | 1.9±1.5   | 7.4±14.8  | 7.1±8.3  | 15.9±9.2 | 27.0±4.6 | 30.8±0.5 | 31.0±0.0 | 0.3±0.2  | 29.6±6.3  | 0.9±0.2  | 15.0±0.2 |          |
|         |          | post-ex | 29.9±0.8 | 8.6±10.1  | 5.3±2.3   | 42.4±36.8 | 18.1±8.7 | 28.2±2.5 | 30.8±0.4 | 31.0±0.0 | 31.0±0.0 | 0.6±0.1  | 31.0±0.0  | 1.0±0.0  | 15.0±0.0 |          |
|         |          | p       | < 0.0001 | < 0.0001  | < 0.0001  | < 0.0001  | < 0.0001 | < 0.0001 | < 0.0001 | 0.250    | >0.999   | < 0.0001 | 0.250     | < 0.0001 | >0.999   |          |
|         | M        | pre-ex  | 24.5±4.1 | 57.0±41.5 | 1.7±1.3   | 4.6±7.8   | 4.5±6.6  | 14.5±9.2 | 26.8±3.9 | 30.8±0.5 | 31.0±0.0 | 0.3±0.2  | 28.0±8.7  | 0.8±0.1  | 15.0±0.0 |          |
|         |          | post-ex | 29.2±1.5 | 15.7±17.8 | 4.5±2.3   | 32.2±31.9 | 14.2±9.1 | 25.9±5.4 | 30.6±0.6 | 31.0±0.0 | 31.0±0.0 | 0.6±0.1  | 31.0±0.0  | 1.0±0.0  | 15.0±0.0 |          |
|         |          | p       | < 0.0001 | < 0.0001  | < 0.0001  | < 0.0001  | < 0.0001 | < 0.0001 | < 0.0001 | 0.250    | >0.999   | < 0.0001 | 0.100     | < 0.0001 | >0.999   |          |
|         | H        | pre-ex  | 23.5±3.7 | 63.0±39.1 | 1.2±0.7   | 1.4±3.6   | 4.3±6.5  | 12.1±8.1 | 25.6±3.7 | 30.8±0.4 | 31.0±0.0 | 0.2±0.1  | 29.4±6.3  | 0.8±0.1  | 15.0±0.0 |          |
|         |          | post-ex | 27.6±3.0 | 33.5±37.8 | 2.8±1.3   | 12.1±11.6 | 10.6±8.7 | 20.8±9.1 | 29.6±1.7 | 31.0±0.0 | 31.0±0.0 | 0.4±0.1  | 31.0±0.2  | 0.9±0.1  | 15.0±0.0 |          |
|         |          | p       | < 0.0001 | 0.006     | < 0.0001  | 0.0001    | < 0.0001 | < 0.0001 | < 0.0001 | 0.125    | >0.999   | < 0.0001 | 0.094     | 0.0003   | >0.999   |          |
|         | G        | L       | pre-ex   | 21.6±2.0  | 25.2±16.9 | 1.5±0.6   | 2.4±2.8  | 7.3±4.1  | 14.5±4.9 | 23.2±1.8 | 25.9±0.3 | 26.0±0.0 | 0.2±0.1   | 25.8±0.6 | 0.9±0.1  | 10.0±0.0 |
|         |          |         | post-ex  | 13.6±3.0  | 61.1±14.1 | 0.0±0.6   | -1.1±0.6 | 3.0±0.0  | 3.4±1.1  | 13.8±5.1 | 23.8±2.5 | 25.8±0.8 | 0.2±0.1   | 6.8±8.8  | 0.7±0.1  | 9.6±4.0  |
|         |          | M       | p        | < 0.0001  | < 0.0001  | < 0.0001  | < 0.0001 | < 0.0001 | < 0.0001 | < 0.0001 | 0.0001   | 0.250    | 0.034     | < 0.0001 | < 0.0001 | 0.500    |
| pre-ex  |          |         | 21.8±1.9 | 23.1±15.5 | 1.4±0.6   | 2.3±3.0   | 8.5±4.9  | 15.0±4.8 | 23.5±1.4 | 26.0±0.0 | 26.0±0.0 | 0.3±0.1  | 25.9±0.4  | 0.9±0.1  | 10.0±0.0 |          |
| post-ex |          |         | 14.6±3.6 | 62.6±12.5 | 0.1±0.7   | -1.0±0.7  | 3.0±0.0  | 3.9±2.1  | 15.1±6.2 | 24.4±2.0 | 26.0±0.0 | 0.2±0.1  | 10.7±11.1 | 0.7±0.1  | 9.0±4.1  |          |
| H       |          | p       | < 0.0001 | < 0.0001  | < 0.0001  | < 0.0001  | < 0.0001 | < 0.0001 | < 0.0001 | < 0.0001 | >0.999   | 0.001    | 0.130     | < 0.0001 | 0.322    |          |
|         |          | pre-ex  | 22.2±1.2 | 21.3±12.3 | 1.6±0.6   | 2.8±3.3   | 7.9±4.5  | 15.9±3.8 | 24.0±1.1 | 26.0±0.0 | 26.0±0.0 | 0.3±0.1  | 26.0±0.5  | 1.0±0.0  | 10.0±0.0 |          |
|         |          | post-ex | 17.6±2.5 | 61.5±17.2 | 0.7±0.5   | -0.6±1.0  | 3.0±0.4  | 5.3±3.0  | 20.0±3.5 | 25.8±0.7 | 26.0±0.0 | 0.2±0.0  | 18.3±11.1 | 0.8±0.1  | 9.3±2.3  |          |
|         |          | p       | < 0.0001 | < 0.0001  | < 0.0001  | < 0.0001  | < 0.0001 | < 0.0001 | < 0.0001 | 0.250    | >0.999   | < 0.0001 | 0.078     | < 0.0001 | 0.500    |          |
|         |          | B       | L        | pre-ex    | 2.4±1.6   | 16.5±20.2 | -2.3±1.2 | 9.9±14.3 | 0.0±0.0  | 0.0±0.0  | 1.0±0.9  | 6.9±5.6  | 15.1±9.1  | 0.4±0.1  | 0.1±0.3  | 0.6±0.1  |
| post-ex | 4.0±0.9  |         |          | 8.2±2.8   | -0.6±0.8  | 1.0±3.9   | 0.0±0.2  | 0.7±0.8  | 3.7±1.4  | 7.9±1.0  | 11.0±2.9 | 0.2±0.0  | 2.0±2.4   | 0.9±0.1  | 0.0±0.0  |          |
| p       | < 0.0001 |         |          | 0.0004    | < 0.0001  | < 0.0001  | >0.999   | 0.0004   | < 0.0001 | < 0.0001 | < 0.0001 | < 0.0001 | 0.0002    | < 0.0001 | -        |          |
| M       | pre-ex   |         | 2.5±1.9  | 19.6±24.8 | -2.7±1.3  | 11.0±10.8 | 0.0±0.0  | 0.0±0.0  | 0.9±0.8  | 7.5±6.5  | 16.5±7.7 | 0.4±0.1  | 0.1±0.3   | 0.5±0.1  | 0.0±0.0  |          |
|         | post-ex  |         | 3.9±1.2  | 9.9±4.0   | -0.9±1.0  | 2.0±5.2   | 0.0±0.0  | 0.5±0.7  | 3.3±1.6  | 8.1±1.4  | 12.3±4.8 | 0.2±0.1  | 2.5±3.1   | 0.8±0.1  | 0.0±0.0  |          |
|         | p        |         | < 0.0001 | 0.143     | < 0.0001  | < 0.0001  | -        | 0.0004   | < 0.0001 | 0.023    | < 0.0001 | < 0.0001 | < 0.0001  | < 0.0001 | -        |          |
| H       | pre-ex   |         | 2.5±1.7  | 22.2±22.4 | -2.6±1.1  | 10.2±10.1 | 0.0±0.0  | 0.0±0.0  | 0.8±0.8  | 7.8±5.8  | 18.3±8.7 | 0.5±0.1  | 0.0±0.0   | 0.5±0.1  | 0.0±0.0  |          |
|         | post-ex  |         | 3.3±0.9  | 14.8±12.4 | -1.4±0.9  | 3.1±5.3   | 0.0±0.0  | 0.0±0.2  | 2.0±1.0  | 8.3±2.9  | 14.1±6.5 | 0.3±0.1  | 0.4±1.5   | 0.7±0.1  | 0.0±0.0  |          |
| p       | < 0.0001 | 0.360   | < 0.0001 | 0.002     | -         | >0.999    | < 0.0001 | < 0.0001 | < 0.0001 | < 0.0001 | < 0.0001 | 0.250    | < 0.0001  | -        |          |          |

R - Red component; G - Green component; B - Blue component. Skewness - skewness coefficient; Perc01, Perc10, Perc50, Perc90, Perc99 - percentiles; Domn01, Domn10 - dominants; Maxm01, Maxm10 - maximum of moments; p - the level of marginal significance; SD - standard deviation.

**Table S6.** The thoracic spine area (ROI 2). Values (mean  $\pm$  SD) of Histogram Statistics (HS) features for three color components (R, red; G, green; B, blue) in light (L), moderate (M), and heavy (H) groups. The pre-exercise (pre-ex) and post exercise (post-ex) data series were compared. When features differed significantly ( $p < 0.05$ ) for all three groups (L, M, H), the values were marked in bold.

| Groups |   |         | Mean                           | Variance                        | Skewness                      | Kurtosis                       | Perc01          | Perc10                        | Perc50                         | Perc90                        | Perc99         | Maxm01                        | Domn01          | Maxm10                        | Domn10         |
|--------|---|---------|--------------------------------|---------------------------------|-------------------------------|--------------------------------|-----------------|-------------------------------|--------------------------------|-------------------------------|----------------|-------------------------------|-----------------|-------------------------------|----------------|
| R      | L | pre-ex  | 29.7 $\pm$ 1.7                 | 12.7 $\pm$ 21.1                 | 3.7 $\pm$ 1.4                 | 22.2 $\pm$ 23.0                | 19.3 $\pm$ 10.7 | 26.6 $\pm$ 5.7                | 30.8 $\pm$ 0.7                 | 31.0 $\pm$ 0.0                | 31.0 $\pm$ 0.0 | 0.7 $\pm$ 0.2                 | 31.0 $\pm$ 0.0  | 1.0 $\pm$ 0.0                 | 15.0 $\pm$ 0.0 |
|        |   | post-ex | 30.3 $\pm$ 0.8                 | 3.3 $\pm$ 4.9                   | 4.1 $\pm$ 2.0                 | 28.7 $\pm$ 29.5                | 24.4 $\pm$ 5.7  | 28.8 $\pm$ 2.2                | 30.9 $\pm$ 0.3                 | 31.0 $\pm$ 0.0                | 31.0 $\pm$ 0.0 | 0.7 $\pm$ 0.2                 | 31.0 $\pm$ 0.0  | 1.0 $\pm$ 0.0                 | 15.0 $\pm$ 0.0 |
|        |   | p       | 0.330                          | 0.059                           | 0.833                         | 0.623                          | 0.078           | 0.063                         | 0.750                          | >0.999                        | >0.999         | 0.317                         | >0.999          | 0.095                         | >0.999         |
|        | M | pre-ex  | 29.3 $\pm$ 1.8                 | 19.3 $\pm$ 28.8                 | 3.6 $\pm$ 1.6                 | 20.8 $\pm$ 27.3                | 16.1 $\pm$ 10.6 | 24.9 $\pm$ 7.2                | 30.9 $\pm$ 0.3                 | 31.0 $\pm$ 0.0                | 31.0 $\pm$ 0.0 | 0.7 $\pm$ 0.1                 | 31.0 $\pm$ 0.0  | 1.0 $\pm$ 0.1                 | 15.0 $\pm$ 0.0 |
|        |   | post-ex | 29.6 $\pm$ 1.4                 | 7.0 $\pm$ 9.1                   | 3.4 $\pm$ 1.4                 | 17.4 $\pm$ 13.8                | 20.9 $\pm$ 7.0  | 27.0 $\pm$ 3.8                | 30.4 $\pm$ 1.1                 | 31.0 $\pm$ 0.0                | 31.0 $\pm$ 0.0 | 0.6 $\pm$ 0.2                 | 31.0 $\pm$ 0.0  | 1.0 $\pm$ 0.0                 | 15.0 $\pm$ 0.0 |
|        |   | p       | 0.491                          | 0.054                           | 0.989                         | 0.833                          | 0.056           | 0.500                         | 0.063                          | >0.999                        | >0.999         | 0.241                         | >0.999          | 0.063                         | >0.999         |
|        | H | pre-ex  | 29.2 $\pm$ 1.7                 | 18.7 $\pm$ 26.1                 | 4.0 $\pm$ 2.1                 | 25.8 $\pm$ 34.1                | 15.1 $\pm$ 10.6 | 25.1 $\pm$ 6.8                | 30.8 $\pm$ 0.5                 | 31.0 $\pm$ 0.0                | 31.0 $\pm$ 0.0 | 0.7 $\pm$ 0.2                 | 31.0 $\pm$ 0.0  | 1.0 $\pm$ 0.0                 | 15.0 $\pm$ 0.0 |
|        |   | post-ex | 29.1 $\pm$ 1.9                 | 12.5 $\pm$ 17.0                 | 3.7 $\pm$ 3.1                 | 30.4 $\pm$ 51.7                | 18.8 $\pm$ 9.9  | 25.6 $\pm$ 5.5                | 30.2 $\pm$ 1.1                 | 31.0 $\pm$ 0.0                | 31.0 $\pm$ 0.0 | 0.5 $\pm$ 0.3                 | 30.9 $\pm$ 0.3  | 1.0 $\pm$ 0.0                 | 15.0 $\pm$ 0.0 |
|        |   | p       | 0.944                          | 0.264                           | 0.406                         | 0.623                          | 0.102           | 0.979                         | 0.077                          | >0.999                        | >0.999         | 0.197                         | 0.500           | >0.999                        | >0.999         |
|        | L | pre-ex  | <b>13.9<math>\pm</math>3.0</b> | <b>57.1<math>\pm</math>13.6</b> | <b>0.0<math>\pm</math>0.5</b> | <b>-1.1<math>\pm</math>0.6</b> | 3.1 $\pm$ 0.4   | <b>3.6<math>\pm</math>1.4</b> | <b>14.1<math>\pm</math>4.8</b> | 23.6 $\pm$ 2.6                | 25.7 $\pm$ 1.1 | 0.2 $\pm$ 0.1                 | 9.4 $\pm$ 10.3  | <b>0.7<math>\pm</math>0.1</b> | 5.4 $\pm$ 3.9  |
|        |   | post-ex | <b>16.9<math>\pm</math>3.2</b> | <b>39.0<math>\pm</math>10.0</b> | <b>0.7<math>\pm</math>0.7</b> | <b>0.0<math>\pm</math>1.8</b>  | 3.2 $\pm$ 0.8   | <b>7.6<math>\pm</math>4.1</b> | <b>18.0<math>\pm</math>4.0</b> | 24.0 $\pm$ 1.8                | 25.8 $\pm$ 0.5 | 0.1 $\pm$ 0.1                 | 18.4 $\pm$ 8.6  | <b>0.8<math>\pm</math>0.1</b> | 8.2 $\pm$ 2.8  |
|        |   | p       | <b>0.0004</b>                  | <b>&lt; 0.0001</b>              | <b>0.001</b>                  | <b>&lt; 0.0001</b>             | 0.750           | <b>&lt; 0.0001</b>            | <b>0.022</b>                   | 0.504                         | >0.999         | 0.084                         | 0.0007          | <b>0.005</b>                  | 0.002          |
| G      | M | pre-ex  | <b>14.7<math>\pm</math>3.2</b> | <b>57.0<math>\pm</math>15.8</b> | <b>0.1<math>\pm</math>0.6</b> | <b>-0.9<math>\pm</math>1.0</b> | 3.2 $\pm$ 0.7   | <b>4.7<math>\pm</math>3.5</b> | <b>15.1<math>\pm</math>4.7</b> | 24.5 $\pm$ 1.8                | 25.8 $\pm$ 0.5 | 0.2 $\pm$ 0.1                 | 9.9 $\pm$ 10.6  | <b>0.7<math>\pm</math>0.1</b> | 6.3 $\pm$ 3.9  |
|        |   | post-ex | <b>18.0<math>\pm</math>4.0</b> | <b>38.6<math>\pm</math>14.8</b> | <b>0.9<math>\pm</math>0.8</b> | <b>0.7<math>\pm</math>2.0</b>  | 3.7 $\pm$ 2.1   | <b>8.7<math>\pm</math>4.9</b> | <b>19.5<math>\pm</math>4.9</b> | 24.5 $\pm$ 2.9                | 25.6 $\pm$ 1.5 | 0.2 $\pm$ 0.1                 | 19.5 $\pm$ 9.0  | <b>0.8<math>\pm</math>0.1</b> | 8.8 $\pm$ 2.7  |
|        |   | p       | <b>0.004</b>                   | <b>0.0004</b>                   | <b>0.001</b>                  | <b>0.0003</b>                  | 0.336           | <b>0.003</b>                  | <b>0.002</b>                   | >0.999                        | 0.625          | >0.999                        | 0.006           | <b>0.0006</b>                 | 0.021          |
|        | H | pre-ex  | <b>15.7<math>\pm</math>3.7</b> | <b>49.9<math>\pm</math>15.8</b> | <b>0.3<math>\pm</math>0.7</b> | <b>-0.6<math>\pm</math>1.1</b> | 3.4 $\pm$ 1.1   | <b>6.0<math>\pm</math>4.0</b> | <b>16.2<math>\pm</math>5.1</b> | 24.6 $\pm$ 2.1                | 26.0 $\pm$ 0.2 | 0.2 $\pm$ 0.1                 | 15.5 $\pm$ 11.3 | <b>0.8<math>\pm</math>0.1</b> | 6.5 $\pm$ 4.0  |
|        |   | post-ex | <b>18.6<math>\pm</math>4.1</b> | <b>35.4<math>\pm</math>11.7</b> | <b>1.0<math>\pm</math>1.1</b> | <b>1.3<math>\pm</math>2.4</b>  | 3.4 $\pm$ 1.1   | <b>9.7<math>\pm</math>4.4</b> | <b>20.0<math>\pm</math>5.1</b> | 24.3 $\pm$ 3.4                | 25.8 $\pm$ 0.5 | 0.2 $\pm$ 0.1                 | 23.3 $\pm$ 5.3  | <b>0.9<math>\pm</math>0.1</b> | 8.7 $\pm$ 2.5  |
|        |   | p       | <b>0.003</b>                   | <b>0.004</b>                    | <b>0.002</b>                  | <b>0.0008</b>                  | 0.953           | <b>0.004</b>                  | <b>0.002</b>                   | 0.822                         | 0.125          | 0.095                         | 0.130           | <b>0.002</b>                  | 0.064          |
|        | L | pre-ex  | <b>3.8<math>\pm</math>0.8</b>  | <b>6.9<math>\pm</math>4.6</b>   | -0.5 $\pm$ 0.8                | 0.6 $\pm$ 3.1                  | 0.1 $\pm$ 0.4   | 0.8 $\pm$ 0.9                 | <b>3.6<math>\pm</math>1.1</b>  | <b>7.0<math>\pm</math>0.8</b> | 10.0 $\pm$ 4.1 | <b>0.2<math>\pm</math>0.1</b> | 2.9 $\pm$ 2.7   | 0.9 $\pm$ 0.1                 | 0.0 $\pm$ 0.0  |
|        |   | post-ex | <b>2.8<math>\pm</math>1.0</b>  | <b>4.0<math>\pm</math>1.5</b>   | -1.1 $\pm$ 0.9                | 2.9 $\pm$ 6.1                  | 0.0 $\pm$ 0.2   | 0.6 $\pm$ 0.6                 | <b>2.5<math>\pm</math>1.1</b>  | <b>5.4<math>\pm</math>1.4</b> | 8.2 $\pm$ 1.4  | <b>0.3<math>\pm</math>0.1</b> | 1.6 $\pm$ 1.2   | 0.9 $\pm$ 0.1                 | 0.0 $\pm$ 0.0  |
|        |   | p       | <b>0.0004</b>                  | <b>&lt; 0.0001</b>              | 0.002                         | 0.011                          | 0.750           | 0.449                         | <b>0.002</b>                   | <b>&lt; 0.0001</b>            | 0.078          | <b>0.005</b>                  | 0.014           | 0.406                         | -              |
|        | M | pre-ex  | <b>3.7<math>\pm</math>1.0</b>  | <b>9.3<math>\pm</math>9.9</b>   | -0.7 $\pm$ 1.0                | 1.6 $\pm$ 4.4                  | 0.0 $\pm$ 0.0   | 0.5 $\pm$ 0.7                 | <b>3.4<math>\pm</math>1.2</b>  | <b>7.5<math>\pm</math>2.9</b> | 11.1 $\pm$ 5.7 | <b>0.2<math>\pm</math>0.1</b> | 2.0 $\pm$ 2.3   | 0.8 $\pm$ 0.1                 | 0.0 $\pm$ 0.0  |
|        |   | post-ex | <b>2.5<math>\pm</math>1.2</b>  | <b>4.2<math>\pm</math>1.8</b>   | -1.2 $\pm$ 0.9                | 3.2 $\pm$ 4.8                  | 0.1 $\pm$ 0.4   | 0.5 $\pm$ 0.9                 | <b>1.9<math>\pm</math>1.5</b>  | <b>5.2<math>\pm</math>1.5</b> | 8.3 $\pm$ 2.1  | <b>0.3<math>\pm</math>0.1</b> | 1.5 $\pm$ 1.9   | 0.8 $\pm$ 0.2                 | 0.0 $\pm$ 0.0  |
|        |   | p       | <b>&lt; 0.0001</b>             | <b>&lt; 0.0001</b>              | 0.027                         | 0.056                          | 0.500           | >0.999                        | <b>0.0008</b>                  | <b>0.0002</b>                 | 0.002          | <b>0.0008</b>                 | 0.491           | 0.303                         | -              |
| B      | H | pre-ex  | <b>3.3<math>\pm</math>1.1</b>  | <b>8.2<math>\pm</math>8.8</b>   | -1.1 $\pm$ 1.6                | 5.0 $\pm$ 9.3                  | 0.0 $\pm$ 0.0   | 0.5 $\pm$ 0.7                 | <b>2.9<math>\pm</math>1.3</b>  | <b>6.8<math>\pm</math>2.7</b> | 11.1 $\pm$ 5.7 | <b>0.2<math>\pm</math>0.1</b> | 1.8 $\pm$ 2.4   | 0.8 $\pm$ 0.1                 | 0.0 $\pm$ 0.0  |
|        |   | post-ex | <b>2.4<math>\pm</math>1.2</b>  | <b>5.1<math>\pm</math>3.4</b>   | -1.5 $\pm$ 1.3                | 5.2 $\pm$ 10.0                 | 0.0 $\pm$ 0.2   | 0.5 $\pm$ 1.0                 | <b>1.9<math>\pm</math>1.6</b>  | <b>5.3<math>\pm</math>1.4</b> | 9.6 $\pm$ 4.1  | <b>0.4<math>\pm</math>0.1</b> | 1.2 $\pm$ 1.8   | 0.7 $\pm$ 0.2                 | 0.0 $\pm$ 0.0  |
|        |   | p       | <b>&lt; 0.0001</b>             | <b>&lt; 0.0001</b>              | 0.208                         | 0.473                          | >0.999          | 0.781                         | <b>0.003</b>                   | <b>0.024</b>                  | 0.094          | <b>0.0002</b>                 | 0.116           | 0.056                         | -              |

R - Red component; G - Green component; B - Blue component. Skewness - skewness coefficient; Perc01, Perc10, Perc50, Perc90, Perc99 - percentiles; Domn01, Domn10 - dominants; Maxm01, Maxm10 - maximum of moments; p - the level of marginal significance; SD - standard deviation.

**Table S7.** The left area of back musculature (ROI 3). Values (mean  $\pm$  SD) of Histogram Statistics (HS) features for three color components (R, red; G, green; B, blue) in light (L), moderate (M), and heavy (H) groups. The pre-exercise (pre-ex) and post exercise (post-ex) data series were compared. When features differed significantly ( $p < 0.05$ ) for all three groups (L, M, H), the values were marked in bold.

| Groups |   |         | Mean                           | Variance                         | Skewness                       | Kurtosis                        | Perc01                          | Perc10                         | Perc50                         | Perc90                         | Perc99                         | Maxm01                        | Domn01                          | Maxm10                        | Domn10                         |
|--------|---|---------|--------------------------------|----------------------------------|--------------------------------|---------------------------------|---------------------------------|--------------------------------|--------------------------------|--------------------------------|--------------------------------|-------------------------------|---------------------------------|-------------------------------|--------------------------------|
| R      | L | pre-ex  | <b>19.6<math>\pm</math>5.9</b> | <b>102.1<math>\pm</math>51.6</b> | <b>0.7<math>\pm</math>1.0</b>  | <b>0.2<math>\pm</math>2.9</b>   | <b>2.5<math>\pm</math>5.9</b>   | <b>6.5<math>\pm</math>9.4</b>  | <b>21.1<math>\pm</math>8.1</b> | 30.7 $\pm$ 0.9                 | 31.0 $\pm$ 0.0                 | <b>0.3<math>\pm</math>0.1</b> | <b>19.4<math>\pm</math>15.3</b> | <b>0.7<math>\pm</math>0.2</b> | 14.4 $\pm$ 3.1                 |
|        |   | post-ex | <b>29.7<math>\pm</math>1.2</b> | <b>11.2<math>\pm</math>16.1</b>  | <b>4.0<math>\pm</math>2.0</b>  | <b>33.8<math>\pm</math>32.1</b> | <b>19.3<math>\pm</math>10.5</b> | <b>26.9<math>\pm</math>4.5</b> | <b>30.8<math>\pm</math>0.4</b> | 31.0 $\pm$ 0.0                 | 31.0 $\pm$ 0.0                 | <b>0.6<math>\pm</math>0.1</b> | <b>31.0<math>\pm</math>0.2</b>  | <b>1.0<math>\pm</math>0.0</b> | 15.0 $\pm$ 0.0                 |
|        |   | p       | <b>&lt; 0.0001</b>             | <b>&lt; 0.0001</b>               | <b>&lt; 0.0001</b>             | <b>&lt; 0.0001</b>              | <b>&lt; 0.0001</b>              | <b>&lt; 0.0001</b>             | <b>&lt; 0.0001</b>             | 0.125                          | >0.999                         | <b>&lt; 0.0001</b>            | <b>0.020</b>                    | <b>&lt; 0.0001</b>            | >0.999                         |
|        | M | pre-ex  | <b>20.0<math>\pm</math>4.7</b> | <b>96.8<math>\pm</math>42.3</b>  | <b>0.7<math>\pm</math>0.8</b>  | <b>0.0<math>\pm</math>2.3</b>   | <b>1.2<math>\pm</math>3.1</b>   | <b>6.3<math>\pm</math>7.1</b>  | <b>21.6<math>\pm</math>6.5</b> | 30.8 $\pm$ 0.4                 | 31.0 $\pm$ 0.0                 | <b>0.2<math>\pm</math>0.1</b> | <b>22.0<math>\pm</math>14.3</b> | <b>0.7<math>\pm</math>0.2</b> | 13.8 $\pm$ 4.2                 |
|        |   | post-ex | <b>29.5<math>\pm</math>1.0</b> | <b>12.9<math>\pm</math>16.2</b>  | <b>3.9<math>\pm</math>1.5</b>  | <b>23.1<math>\pm</math>19.8</b> | <b>16.5<math>\pm</math>7.4</b>  | <b>26.1<math>\pm</math>4.3</b> | <b>30.8<math>\pm</math>0.4</b> | 31.0 $\pm$ 0.0                 | 31.0 $\pm$ 0.0                 | <b>0.6<math>\pm</math>0.1</b> | <b>31.0<math>\pm</math>0.0</b>  | <b>1.0<math>\pm</math>0.0</b> | 15.0 $\pm$ 0.0                 |
|        |   | p       | <b>&lt; 0.0001</b>             | <b>&lt; 0.0001</b>               | <b>&lt; 0.0001</b>             | <b>&lt; 0.0001</b>              | <b>&lt; 0.0001</b>              | <b>&lt; 0.0001</b>             | <b>&lt; 0.0001</b>             | 0.125                          | >0.999                         | <b>&lt; 0.0001</b>            | <b>&lt; 0.0001</b>              | <b>&lt; 0.0001</b>            | 0.500                          |
|        | H | pre-ex  | <b>19.5<math>\pm</math>5.5</b> | <b>95.9<math>\pm</math>41.4</b>  | <b>0.6<math>\pm</math>0.8</b>  | <b>-0.2<math>\pm</math>1.6</b>  | <b>1.6<math>\pm</math>3.1</b>   | <b>6.0<math>\pm</math>6.8</b>  | <b>21.3<math>\pm</math>7.8</b> | 30.4 $\pm$ 1.9                 | 31.0 $\pm$ 0.2                 | <b>0.2<math>\pm</math>0.1</b> | <b>19.3<math>\pm</math>15.3</b> | <b>0.7<math>\pm</math>0.2</b> | 13.8 $\pm$ 4.2                 |
|        |   | post-ex | <b>28.6<math>\pm</math>2.0</b> | <b>25.1<math>\pm</math>31.7</b>  | <b>3.6<math>\pm</math>2.1</b>  | <b>24.8<math>\pm</math>32.7</b> | <b>13.6<math>\pm</math>9.9</b>  | <b>23.0<math>\pm</math>7.8</b> | <b>30.5<math>\pm</math>0.5</b> | 31.0 $\pm$ 0.0                 | 31.0 $\pm$ 0.0                 | <b>0.5<math>\pm</math>0.1</b> | <b>31.0<math>\pm</math>0.2</b>  | <b>1.0<math>\pm</math>0.1</b> | 15.0 $\pm$ 0.0                 |
|        |   | p       | <b>&lt; 0.0001</b>             | <b>&lt; 0.0001</b>               | <b>&lt; 0.0001</b>             | <b>0.0004</b>                   | <b>&lt; 0.0001</b>              | <b>&lt; 0.0001</b>             | <b>&lt; 0.0001</b>             | 0.011                          | 0.303                          | <b>&lt; 0.0001</b>            | <b>0.0008</b>                   | <b>&lt; 0.0001</b>            | 0.107                          |
|        | L | pre-ex  | <b>20.9<math>\pm</math>1.5</b> | <b>26.2<math>\pm</math>11.1</b>  | <b>1.1<math>\pm</math>0.6</b>  | <b>1.2<math>\pm</math>2.2</b>   | <b>6.7<math>\pm</math>3.0</b>   | <b>13.7<math>\pm</math>3.4</b> | <b>22.3<math>\pm</math>1.8</b> | <b>26.0<math>\pm</math>0.2</b> | 26.0 $\pm$ 0.0                 | 0.2 $\pm$ 0.1                 | <b>25.6<math>\pm</math>2.0</b>  | <b>0.9<math>\pm</math>0.0</b> | <b>10.0<math>\pm</math>0.0</b> |
|        |   | post-ex | <b>12.6<math>\pm</math>3.5</b> | <b>62.4<math>\pm</math>13.8</b>  | <b>-0.3<math>\pm</math>0.7</b> | <b>-0.9<math>\pm</math>1.0</b>  | <b>3.0<math>\pm</math>0.0</b>   | <b>3.2<math>\pm</math>0.7</b>  | <b>11.7<math>\pm</math>5.9</b> | <b>23.7<math>\pm</math>2.9</b> | 25.6 $\pm$ 0.8                 | 0.3 $\pm$ 0.1                 | <b>7.8<math>\pm</math>9.5</b>   | <b>0.7<math>\pm</math>0.1</b> | <b>4.7<math>\pm</math>3.9</b>  |
|        |   | p       | <b>&lt; 0.0001</b>             | <b>&lt; 0.0001</b>               | <b>&lt; 0.0001</b>             | <b>&lt; 0.0001</b>              | <b>&lt; 0.0001</b>              | <b>&lt; 0.0001</b>             | <b>&lt; 0.0001</b>             | <b>&lt; 0.0001</b>             | 0.094                          | 0.125                         | <b>&lt; 0.0001</b>              | <b>&lt; 0.0001</b>            | <b>&lt; 0.0001</b>             |
| G      | M | pre-ex  | <b>21.6<math>\pm</math>1.4</b> | <b>22.5<math>\pm</math>9.7</b>   | <b>1.5<math>\pm</math>0.7</b>  | <b>2.9<math>\pm</math>3.2</b>   | <b>6.3<math>\pm</math>3.3</b>   | <b>15.2<math>\pm</math>3.2</b> | <b>23.0<math>\pm</math>1.7</b> | <b>26.0<math>\pm</math>0.0</b> | 26.0 $\pm$ 0.0                 | 0.2 $\pm$ 0.1                 | <b>26.0<math>\pm</math>0.0</b>  | <b>1.0<math>\pm</math>0.0</b> | <b>10.0<math>\pm</math>0.0</b> |
|        |   | post-ex | <b>14.3<math>\pm</math>2.2</b> | <b>73.4<math>\pm</math>8.8</b>   | <b>0.1<math>\pm</math>0.4</b>  | <b>-1.4<math>\pm</math>0.3</b>  | <b>3.0<math>\pm</math>0.0</b>   | <b>3.1<math>\pm</math>0.4</b>  | <b>14.5<math>\pm</math>4.3</b> | <b>25.5<math>\pm</math>0.8</b> | 26.0 $\pm$ 0.0                 | 0.2 $\pm$ 0.1                 | <b>7.8<math>\pm</math>9.5</b>   | <b>0.7<math>\pm</math>0.1</b> | <b>5.7<math>\pm</math>4.1</b>  |
|        |   | p       | <b>&lt; 0.0001</b>             | <b>&lt; 0.0001</b>               | <b>&lt; 0.0001</b>             | <b>&lt; 0.0001</b>              | <b>&lt; 0.0001</b>              | <b>&lt; 0.0001</b>             | <b>&lt; 0.0001</b>             | <b>0.0002</b>                  | >0.999                         | 0.491                         | <b>&lt; 0.0001</b>              | <b>&lt; 0.0001</b>            | <b>&lt; 0.0001</b>             |
|        | H | pre-ex  | <b>21.4<math>\pm</math>1.5</b> | <b>23.9<math>\pm</math>9.2</b>   | <b>1.3<math>\pm</math>0.7</b>  | <b>2.0<math>\pm</math>2.7</b>   | <b>6.8<math>\pm</math>3.3</b>   | <b>14.5<math>\pm</math>3.2</b> | <b>22.9<math>\pm</math>2.0</b> | <b>26.0<math>\pm</math>0.2</b> | 26.0 $\pm$ 0.0                 | 0.2 $\pm$ 0.1                 | <b>25.4<math>\pm</math>3.1</b>  | <b>1.0<math>\pm</math>0.0</b> | <b>10.0<math>\pm</math>0.0</b> |
|        |   | post-ex | <b>14.9<math>\pm</math>3.8</b> | <b>63.7<math>\pm</math>15.7</b>  | <b>0.1<math>\pm</math>0.8</b>  | <b>-0.8<math>\pm</math>1.1</b>  | <b>3.0<math>\pm</math>0.2</b>   | <b>3.9<math>\pm</math>1.5</b>  | <b>16.0<math>\pm</math>6.2</b> | <b>24.6<math>\pm</math>3.0</b> | 25.8 $\pm$ 0.8                 | 0.2 $\pm$ 0.1                 | <b>13.5<math>\pm</math>11.7</b> | <b>0.7<math>\pm</math>0.1</b> | <b>7.0<math>\pm</math>4.0</b>  |
|        |   | p       | <b>&lt; 0.0001</b>             | <b>&lt; 0.0001</b>               | <b>&lt; 0.0001</b>             | <b>&lt; 0.0001</b>              | <b>&lt; 0.0001</b>              | <b>&lt; 0.0001</b>             | <b>&lt; 0.0001</b>             | <b>0.020</b>                   | 0.322                          | 0.330                         | <b>&lt; 0.0001</b>              | <b>&lt; 0.0001</b>            | <b>0.0004</b>                  |
|        | L | pre-ex  | 5.7 $\pm$ 3.7                  | <b>58.9<math>\pm</math>43.6</b>  | <b>-1.4<math>\pm</math>0.9</b> | 2.3 $\pm$ 4.7                   | 0.0 $\pm$ 0.0                   | 0.0 $\pm$ 0.0                  | 2.8 $\pm$ 3.8                  | 16.7 $\pm$ 9.5                 | <b>21.7<math>\pm</math>7.9</b> | <b>0.4<math>\pm</math>0.1</b> | <b>0.0<math>\pm</math>0.0</b>   | <b>0.5<math>\pm</math>0.1</b> | 1.4 $\pm$ 3.7                  |
|        |   | post-ex | 4.5 $\pm$ 1.3                  | <b>9.1<math>\pm</math>2.6</b>    | <b>-0.4<math>\pm</math>0.7</b> | 0.4 $\pm$ 2.1                   | 0.1 $\pm$ 0.3                   | 0.7 $\pm$ 1.0                  | 4.5 $\pm$ 1.8                  | 8.5 $\pm$ 1.2                  | <b>11.5<math>\pm</math>2.6</b> | <b>0.2<math>\pm</math>0.1</b> | <b>3.4<math>\pm</math>3.5</b>   | <b>0.9<math>\pm</math>0.1</b> | 0.0 $\pm$ 0.0                  |
|        |   | p       | 0.527                          | <b>0.004</b>                     | <b>&lt; 0.0001</b>             | 0.208                           | 0.500                           | 0.0008                         | <b>&lt; 0.0001</b>             | 0.027                          | <b>&lt; 0.0001</b>             | <b>&lt; 0.0001</b>            | <b>&lt; 0.0001</b>              | <b>&lt; 0.0001</b>            | 0.250                          |
|        | M | pre-ex  | 4.6 $\pm$ 3.2                  | <b>45.8<math>\pm</math>37.3</b>  | <b>-2.2<math>\pm</math>1.4</b> | 6.8 $\pm$ 10.4                  | 0.0 $\pm$ 0.0                   | 0.0 $\pm$ 0.0                  | 1.8 $\pm$ 1.9                  | 14.0 $\pm$ 8.7                 | <b>22.1<math>\pm</math>5.8</b> | <b>0.4<math>\pm</math>0.1</b> | <b>0.0<math>\pm</math>0.0</b>   | <b>0.5<math>\pm</math>0.1</b> | 0.9 $\pm$ 3.1                  |
|        |   | post-ex | 3.9 $\pm$ 0.6                  | <b>10.3<math>\pm</math>3.0</b>   | <b>-0.6<math>\pm</math>0.8</b> | 0.7 $\pm$ 3.8                   | 0.0 $\pm$ 0.0                   | 0.1 $\pm$ 0.3                  | 3.4 $\pm$ 1.0                  | 8.0 $\pm$ 0.7                  | <b>11.7<math>\pm</math>3.9</b> | <b>0.2<math>\pm</math>0.1</b> | <b>1.7<math>\pm</math>2.9</b>   | <b>0.8<math>\pm</math>0.1</b> | 0.0 $\pm$ 0.0                  |
|        |   | p       | 0.406                          | <b>0.0004</b>                    | <b>&lt; 0.0001</b>             | 0.002                           | -                               | 0.250                          | <b>&lt; 0.0001</b>             | <b>&lt; 0.0001</b>             | <b>&lt; 0.0001</b>             | <b>&lt; 0.0001</b>            | <b>0.0004</b>                   | <b>&lt; 0.0001</b>            | 0.500                          |
| B      | H | pre-ex  | 5.2 $\pm$ 3.9                  | <b>52.2<math>\pm</math>43.0</b>  | <b>-1.7<math>\pm</math>1.0</b> | 3.4 $\pm$ 4.8                   | 0.0 $\pm$ 0.0                   | 0.0 $\pm$ 0.0                  | 2.3 $\pm$ 4.1                  | 14.9 $\pm$ 9.4                 | <b>21.4<math>\pm</math>7.6</b> | <b>0.4<math>\pm</math>0.1</b> | <b>0.0<math>\pm</math>0.0</b>   | <b>0.5<math>\pm</math>0.1</b> | 0.9 $\pm$ 3.1                  |
|        |   | post-ex | 3.9 $\pm$ 1.3                  | <b>12.7<math>\pm</math>9.9</b>   | <b>-0.9<math>\pm</math>0.9</b> | 1.4 $\pm$ 3.4                   | 0.0 $\pm$ 0.2                   | 0.4 $\pm$ 1.0                  | 3.3 $\pm$ 1.7                  | 8.3 $\pm$ 2.1                  | <b>13.4<math>\pm</math>6.1</b> | <b>0.2<math>\pm</math>0.1</b> | <b>1.5<math>\pm</math>2.8</b>   | <b>0.8<math>\pm</math>0.1</b> | 0.0 $\pm$ 0.0                  |
|        |   | p       | 0.100                          | <b>&lt; 0.0001</b>               | <b>0.022</b>                   | >0.999                          | 0.406                           | 0.110                          | 0.277                          | 0.070                          | <b>0.0004</b>                  | <b>&lt; 0.0001</b>            | <b>0.002</b>                    | <b>&lt; 0.0001</b>            | 0.500                          |

R - Red component; G - Green component; B - Blue component. Skewness - skewness coefficient; Perc01, Perc10, Perc50, Perc90, Perc99 - percentiles; Domn01, Domn10 - dominants; Maxm01, Maxm10 - maximum of moments; p - the level of marginal significance; SD - standard deviation.

**Table S8.** The right area of back musculature (ROI 4). Values (mean  $\pm$  SD) of Histogram Statistics (HS) features for three color components (R, red; G, green; B, blue) in light (L), moderate (M), and heavy (H) groups. The pre-exercise (pre-ex) and post exercise (post-ex) data series were compared. When features differed significantly ( $p < 0.05$ ) for all three groups (L, M, H), the values were marked in bold.

| Groups |   |         | Mean           | Variance         | Skewness       | Kurtosis        | Perc01         | Perc10         | Perc50         | Perc90         | Perc99         | Maxm01        | Domn01          | Maxm10        | Domn10         |
|--------|---|---------|----------------|------------------|----------------|-----------------|----------------|----------------|----------------|----------------|----------------|---------------|-----------------|---------------|----------------|
| R      | L | pre-ex  | 19.4 $\pm$ 5.6 | 100.3 $\pm$ 47.6 | 0.6 $\pm$ 0.9  | 0.0 $\pm$ 2.5   | 2.6 $\pm$ 5.6  | 5.9 $\pm$ 8.7  | 20.6 $\pm$ 7.9 | 30.5 $\pm$ 0.8 | 31.0 $\pm$ 0.0 | 0.2 $\pm$ 0.1 | 20.5 $\pm$ 14.8 | 0.7 $\pm$ 0.2 | 14.3 $\pm$ 3.1 |
|        |   | post-ex | 29.6 $\pm$ 1.3 | 11.3 $\pm$ 16.5  | 4.5 $\pm$ 1.9  | 32.7 $\pm$ 35.2 | 17.2 $\pm$ 8.2 | 27.0 $\pm$ 4.6 | 30.8 $\pm$ 0.5 | 31.0 $\pm$ 0.0 | 31.0 $\pm$ 0.0 | 0.6 $\pm$ 0.1 | 31.0 $\pm$ 0.0  | 1.0 $\pm$ 0.0 | 15.0 $\pm$ 0.0 |
|        |   | p       | < 0.0001       | < 0.0001         | < 0.0001       | < 0.0001        | < 0.0001       | < 0.0001       | < 0.0001       | 0.016          | >0.999         | < 0.0001      | 0.002           | < 0.0001      | 0.500          |
|        | M | pre-ex  | 18.6 $\pm$ 5.2 | 100.6 $\pm$ 39.9 | 0.5 $\pm$ 0.9  | -0.3 $\pm$ 2.8  | 1.8 $\pm$ 5.1  | 4.8 $\pm$ 7.6  | 19.7 $\pm$ 7.6 | 30.3 $\pm$ 1.0 | 31.0 $\pm$ 0.0 | 0.2 $\pm$ 0.1 | 20.4 $\pm$ 14.7 | 0.6 $\pm$ 0.2 | 13.7 $\pm$ 4.2 |
|        |   | post-ex | 29.4 $\pm$ 1.0 | 15.6 $\pm$ 14.0  | 4.6 $\pm$ 1.9  | 32.1 $\pm$ 30.7 | 13.2 $\pm$ 8.5 | 26.0 $\pm$ 4.0 | 30.7 $\pm$ 0.5 | 31.0 $\pm$ 0.0 | 31.0 $\pm$ 0.0 | 0.6 $\pm$ 0.1 | 31.0 $\pm$ 0.0  | 1.0 $\pm$ 0.0 | 15.0 $\pm$ 0.0 |
|        |   | p       | < 0.0001       | < 0.0001         | < 0.0001       | < 0.0001        | < 0.0001       | < 0.0001       | < 0.0001       | 0.002          | >0.999         | < 0.0001      | 0.001           | < 0.0001      | 0.250          |
|        | H | pre-ex  | 18.3 $\pm$ 4.6 | 102.3 $\pm$ 39.1 | 0.4 $\pm$ 0.7  | -0.5 $\pm$ 2.0  | 1.2 $\pm$ 3.5  | 4.5 $\pm$ 6.5  | 19.1 $\pm$ 6.3 | 30.4 $\pm$ 1.2 | 31.0 $\pm$ 0.2 | 0.2 $\pm$ 0.1 | 18.0 $\pm$ 15.5 | 0.6 $\pm$ 0.2 | 14.3 $\pm$ 3.1 |
|        |   | post-ex | 29.1 $\pm$ 1.6 | 20.0 $\pm$ 25.4  | 4.9 $\pm$ 3.0  | 45.1 $\pm$ 62.9 | 14.1 $\pm$ 9.9 | 25.0 $\pm$ 6.7 | 30.5 $\pm$ 0.5 | 31.0 $\pm$ 0.0 | 31.0 $\pm$ 0.0 | 0.5 $\pm$ 0.1 | 31.0 $\pm$ 0.2  | 1.0 $\pm$ 0.0 | 15.0 $\pm$ 0.0 |
|        |   | p       | < 0.0001       | < 0.0001         | < 0.0001       | < 0.0001        | < 0.0001       | < 0.0001       | < 0.0001       | 0.008          | >0.999         | < 0.0001      | < 0.0001        | < 0.0001      | 0.500          |
|        | L | pre-ex  | 21.2 $\pm$ 1.5 | 24.9 $\pm$ 11.5  | 1.2 $\pm$ 0.5  | 1.5 $\pm$ 1.8   | 6.6 $\pm$ 4.4  | 14.1 $\pm$ 3.7 | 22.5 $\pm$ 1.7 | 26.0 $\pm$ 0.0 | 26.0 $\pm$ 0.0 | 0.2 $\pm$ 0.1 | 26.0 $\pm$ 0.0  | 1.0 $\pm$ 0.0 | 10.0 $\pm$ 0.0 |
|        |   | post-ex | 13.4 $\pm$ 3.3 | 64.5 $\pm$ 12.4  | -0.1 $\pm$ 0.7 | -1.0 $\pm$ 0.7  | 3.0 $\pm$ 0.0  | 3.5 $\pm$ 1.1  | 12.5 $\pm$ 5.4 | 24.4 $\pm$ 2.2 | 25.9 $\pm$ 0.6 | 0.2 $\pm$ 0.1 | 8.8 $\pm$ 10.2  | 0.7 $\pm$ 0.1 | 4.3 $\pm$ 3.7  |
|        |   | p       | < 0.0001       | < 0.0001         | < 0.0001       | < 0.0001        | < 0.0001       | < 0.0001       | < 0.0001       | < 0.0001       | >0.999         | 0.473         | < 0.0001        | < 0.0001      | < 0.0001       |
| G      | M | pre-ex  | 21.3 $\pm$ 1.6 | 22.5 $\pm$ 12.1  | 1.2 $\pm$ 0.7  | 1.7 $\pm$ 2.7   | 7.5 $\pm$ 4.2  | 14.9 $\pm$ 3.8 | 22.6 $\pm$ 1.8 | 26.0 $\pm$ 0.0 | 26.0 $\pm$ 0.0 | 0.2 $\pm$ 0.1 | 26.0 $\pm$ 0.0  | 1.0 $\pm$ 0.1 | 10.0 $\pm$ 0.0 |
|        |   | post-ex | 13.9 $\pm$ 2.8 | 68.9 $\pm$ 7.8   | 0.0 $\pm$ 0.5  | -1.3 $\pm$ 0.4  | 3.0 $\pm$ 0.0  | 3.2 $\pm$ 0.5  | 13.7 $\pm$ 5.6 | 25.1 $\pm$ 1.3 | 26.0 $\pm$ 0.0 | 0.2 $\pm$ 0.1 | 7.8 $\pm$ 9.5   | 0.7 $\pm$ 0.1 | 5.7 $\pm$ 4.1  |
|        |   | p       | < 0.0001       | < 0.0001         | < 0.0001       | < 0.0001        | < 0.0001       | < 0.0001       | < 0.0001       | 0.0005         | >0.999         | 0.768         | < 0.0001        | < 0.0001      | < 0.0001       |
|        | H | pre-ex  | 21.6 $\pm$ 1.5 | 20.7 $\pm$ 8.9   | 1.4 $\pm$ 0.7  | 2.6 $\pm$ 2.7   | 7.1 $\pm$ 4.2  | 15.8 $\pm$ 2.9 | 22.8 $\pm$ 1.6 | 26.0 $\pm$ 0.0 | 26.0 $\pm$ 0.0 | 0.2 $\pm$ 0.1 | 26.0 $\pm$ 0.0  | 1.0 $\pm$ 0.0 | 10.0 $\pm$ 0.0 |
|        |   | post-ex | 13.3 $\pm$ 3.2 | 65.1 $\pm$ 14.8  | -0.1 $\pm$ 0.6 | -1.1 $\pm$ 0.8  | 3.0 $\pm$ 0.2  | 3.4 $\pm$ 1.2  | 13.0 $\pm$ 5.5 | 24.2 $\pm$ 2.6 | 25.9 $\pm$ 0.3 | 0.2 $\pm$ 0.1 | 7.8 $\pm$ 9.5   | 0.7 $\pm$ 0.1 | 5.7 $\pm$ 4.1  |
|        |   | p       | < 0.0001       | < 0.0001         | < 0.0001       | < 0.0001        | < 0.0001       | < 0.0001       | < 0.0001       | < 0.0001       | 0.500          | 0.663         | < 0.0001        | < 0.0001      | < 0.0001       |
|        | L | pre-ex  | 5.4 $\pm$ 3.5  | 55.5 $\pm$ 40.0  | -1.5 $\pm$ 0.8 | 1.9 $\pm$ 3.3   | 0.0 $\pm$ 0.0  | 0.0 $\pm$ 0.0  | 2.5 $\pm$ 2.7  | 16.4 $\pm$ 9.2 | 21.8 $\pm$ 8.3 | 0.4 $\pm$ 0.1 | 0.0 $\pm$ 0.0   | 0.5 $\pm$ 0.1 | 1.4 $\pm$ 3.7  |
|        |   | post-ex | 4.2 $\pm$ 1.1  | 9.1 $\pm$ 3.1    | -0.5 $\pm$ 0.8 | 0.6 $\pm$ 3.2   | 0.0 $\pm$ 0.2  | 0.5 $\pm$ 0.8  | 3.9 $\pm$ 1.5  | 8.1 $\pm$ 1.1  | 11.0 $\pm$ 3.0 | 0.2 $\pm$ 0.1 | 2.6 $\pm$ 3.3   | 0.8 $\pm$ 0.1 | 0.0 $\pm$ 0.0  |
|        |   | p       | 0.241          | < 0.0001         | < 0.0001       | 0.178           | >0.999         | 0.008          | 0.021          | 0.0009         | < 0.0001       | < 0.0001      | 0.001           | < 0.0001      | 0.250          |
|        | M | pre-ex  | 5.4 $\pm$ 3.4  | 53.5 $\pm$ 38.0  | -1.5 $\pm$ 0.8 | 1.9 $\pm$ 3.2   | 0.0 $\pm$ 0.0  | 0.0 $\pm$ 0.0  | 2.7 $\pm$ 4.0  | 16.3 $\pm$ 8.1 | 22.5 $\pm$ 6.2 | 0.4 $\pm$ 0.1 | 0.0 $\pm$ 0.0   | 0.5 $\pm$ 0.1 | 1.4 $\pm$ 3.7  |
|        |   | post-ex | 4.1 $\pm$ 1.0  | 10.1 $\pm$ 3.3   | -0.7 $\pm$ 0.8 | 1.4 $\pm$ 3.9   | 0.0 $\pm$ 0.0  | 0.3 $\pm$ 0.5  | 3.8 $\pm$ 1.6  | 8.1 $\pm$ 0.9  | 11.9 $\pm$ 3.9 | 0.2 $\pm$ 0.1 | 2.7 $\pm$ 3.2   | 0.8 $\pm$ 0.1 | 0.0 $\pm$ 0.0  |
|        |   | p       | 0.188          | < 0.0001         | 0.007          | 0.473           | -              | 0.063          | 0.016          | < 0.0001       | < 0.0001       | < 0.0001      | < 0.0001        | < 0.0001      | 0.250          |
| B      | H | pre-ex  | 5.4 $\pm$ 3.4  | 55.1 $\pm$ 38.6  | -1.7 $\pm$ 1.1 | 3.8 $\pm$ 6.5   | 0.0 $\pm$ 0.0  | 0.0 $\pm$ 0.0  | 2.3 $\pm$ 2.9  | 16.0 $\pm$ 8.7 | 23.0 $\pm$ 6.2 | 0.4 $\pm$ 0.1 | 0.0 $\pm$ 0.0   | 0.5 $\pm$ 0.1 | 0.9 $\pm$ 3.1  |
|        |   | post-ex | 4.4 $\pm$ 1.1  | 11.5 $\pm$ 5.8   | -0.7 $\pm$ 0.8 | 1.3 $\pm$ 3.2   | 0.0 $\pm$ 0.0  | 0.6 $\pm$ 0.9  | 3.9 $\pm$ 1.4  | 8.6 $\pm$ 1.3  | 13.1 $\pm$ 5.1 | 0.2 $\pm$ 0.1 | 2.4 $\pm$ 3.3   | 0.8 $\pm$ 0.1 | 0.0 $\pm$ 0.0  |
|        |   | p       | 0.375          | < 0.0001         | 0.008          | 0.121           | -              | 0.004          | < 0.0001       | < 0.0001       | < 0.0001       | < 0.0001      | < 0.0001        | < 0.0001      | 0.500          |

R - Red component; G - Green component; B - Blue component. Skewness - skewness coefficient; Perc01, Perc10, Perc50, Perc90, Perc99 - percentiles; Domn01, Domn10 - dominants; Maxm01, Maxm10 - maximum of moments; p - the level of marginal significance; SD - standard deviation.

**Table S9.** The withers area (ROI 1). Values (mean  $\pm$  SD) of Gray Level Run Length Matrix (GLRLM) features for three color components (R, red; G, green; B, blue) in light (L), moderate (M), and heavy (H) groups. The pre-exercise (pre-ex) and post exercise (post-ex) data series were compared. When features differed significantly ( $p < 0.05$ ) for all three groups (L, M, H), the values were marked in bold.

| Groups |   | GLN     | RLN           | LRE         | SRE           | Fraction | MRLN     | MGLN     |          |
|--------|---|---------|---------------|-------------|---------------|----------|----------|----------|----------|
| R      | L | pre-ex  | 3999.0±3027.0 | 577.0±153.1 | 123.6±132.0   | 0.6±0.1  | 0.3±0.1  | 0.3±0.1  | 0.1±0.0  |
|        |   | post-ex | 881.8±1106.0  | 555.0±217.1 | 1252.0±1382.0 | 0.3±0.1  | 0.1±0.1  | 0.1±0.1  | 0.2±0.1  |
|        |   | p       | < 0.0001      | 0.527       | < 0.0001      | < 0.0001 | < 0.0001 | < 0.0001 | < 0.0001 |
|        | M | pre-ex  | 4843.0±3631.0 | 616.4±198.6 | 110.8±122.0   | 0.6±0.1  | 0.3±0.1  | 0.3±0.1  | 0.1±0.0  |
|        |   | post-ex | 1429.0±1389.0 | 589.6±176.3 | 681.7±740.4   | 0.4±0.2  | 0.1±0.1  | 0.2±0.1  | 0.1±0.1  |
|        |   | p       | < 0.0001      | 0.833       | < 0.0001      | 0.0004   | < 0.0001 | < 0.0001 | < 0.0001 |
|        | H | pre-ex  | 5550.0±3400.0 | 637.0±170.1 | 73.2±91.0     | 0.6±0.1  | 0.4±0.1  | 0.4±0.1  | 0.1±0.0  |
|        |   | post-ex | 3343.0±3581.0 | 702.4±184.5 | 256.5±234.2   | 0.5±0.2  | 0.2±0.1  | 0.2±0.1  | 0.1±0.0  |
|        |   | p       | 0.014         | 0.121       | 0.070         | 0.0004   | < 0.0001 | 0.0004   | 0.0001   |
|        | L | pre-ex  | 2702.0±1718.0 | 821.1±242.3 | 37.5±18.4     | 0.5±0.1  | 0.3±0.1  | 0.2±0.1  | 0.1±0.0  |
|        |   | post-ex | 6227.0±2700.0 | 792.2±239.9 | 29.7±12.8     | 0.6±0.1  | 0.4±0.1  | 0.4±0.1  | 0.0±0.0  |
|        |   | p       | < 0.0001      | 0.705       | 0.241         | < 0.0001 | < 0.0001 | < 0.0001 | < 0.0001 |
| G      | M | pre-ex  | 2833.0±1684.0 | 905.8±305.3 | 45.3±27.0     | 0.4±0.1  | 0.3±0.1  | 0.2±0.1  | 0.1±0.0  |
|        |   | post-ex | 5817.0±1564.0 | 785.8±170.3 | 29.8±8.8      | 0.6±0.0  | 0.4±0.0  | 0.4±0.0  | 0.0±0.0  |
|        |   | p       | < 0.0001      | 0.095       | 0.105         | < 0.0001 | < 0.0001 | < 0.0001 | < 0.0001 |
|        | H | pre-ex  | 2649.0±1507.0 | 943.6±344.6 | 43.9±27.5     | 0.5±0.1  | 0.3±0.1  | 0.2±0.1  | 0.1±0.0  |
|        |   | post-ex | 6094.0±1816.0 | 946.0±260.6 | 31.5±20.0     | 0.6±0.0  | 0.4±0.1  | 0.3±0.0  | 0.1±0.0  |
|        |   | p       | < 0.0001      | 0.833       | 0.150         | < 0.0001 | < 0.0001 | < 0.0001 | < 0.0001 |
|        | L | pre-ex  | 1644.0±2066.0 | 675.5±209.3 | 192.5±140.4   | 0.4±0.2  | 0.2±0.1  | 0.2±0.1  | 0.1±0.1  |
|        |   | post-ex | 918.4±484.6   | 867.4±276.5 | 88.5±56.1     | 0.2±0.1  | 0.2±0.0  | 0.1±0.0  | 0.1±0.0  |
|        |   | p       | 0.197         | 0.013       | 0.004         | 0.0008   | 0.989    | 0.056    | 0.277    |
|        | M | pre-ex  | 2114.0±2456.0 | 689.3±177.5 | 207.2±164.2   | 0.4±0.2  | 0.2±0.1  | 0.2±0.1  | 0.1±0.1  |
|        |   | post-ex | 1039.0±521.6  | 832.5±194.6 | 93.2±52.3     | 0.3±0.1  | 0.2±0.0  | 0.1±0.0  | 0.1±0.0  |
|        |   | p       | 0.128         | 0.007       | 0.0008        | 0.0008   | 0.705    | 0.087    | 0.197    |
| B      | H | pre-ex  | 2324.0±2496.0 | 674.9±195.7 | 217.4±203.7   | 0.4±0.2  | 0.2±0.1  | 0.2±0.1  | 0.1±0.1  |
|        |   | post-ex | 1892.0±1834.0 | 929.9±216.4 | 118.8±83.0    | 0.3±0.2  | 0.2±0.1  | 0.2±0.1  | 0.1±0.0  |
|        | p | 0.899   | < 0.0001      | 0.015       | 0.018         | 0.584    | 0.164    | 0.406    |          |

R - Red component; G - Green component; B - Blue component. GLN - gray level non-uniformity, RLN - run-length nonuniformity, LRE - long-run emphasis, SRE - short-run emphasis, Fraction - a fraction of image in runs, MRLN - run-length nonuniformity moment, MGLN - gray level non-uniformity moment.

**Table S10.** The thoracic spine area (ROI 2). Values (mean  $\pm$  SD) of Gray Level Run Length Matrix (GLRLM) features for three color components (R, red; G, green; B, blue) in light (L), moderate (M), and heavy (H) groups. The pre-exercise (pre-ex) and post exercise (post-ex) data series were compared. When features differed significantly ( $p < 0.05$ ) for all three groups (L, M, H), the values were marked in bold.

| Groups |   | GLN     | RLN                 | LRE                                | SRE                 | Fraction      | MRLN          | MGLN          |
|--------|---|---------|---------------------|------------------------------------|---------------------|---------------|---------------|---------------|
| R      | L | pre-ex  | 1139.0 $\pm$ 1625.0 | <b>469.2<math>\pm</math>158.5</b>  | 1266.0 $\pm$ 1251.0 | 0.3 $\pm$ 0.2 | 0.1 $\pm$ 0.1 | 0.2 $\pm$ 0.1 |
|        |   | post-ex | 588.4 $\pm$ 947.0   | <b>644.5<math>\pm</math>246.9</b>  | 1045.0 $\pm$ 804.1  | 0.2 $\pm$ 0.1 | 0.1 $\pm$ 0.1 | 0.3 $\pm$ 0.1 |
|        |   | p       | 0.241               | <b>0.003</b>                       | 0.473               | 0.016         | 0.643         | 0.160         |
|        | M | pre-ex  | 1644.0 $\pm$ 1984.0 | <b>491.4<math>\pm</math>137.2</b>  | 963.9 $\pm$ 884.3   | 0.4 $\pm$ 0.2 | 0.1 $\pm$ 0.1 | 0.2 $\pm$ 0.1 |
|        |   | post-ex | 1333.0 $\pm$ 2075.0 | <b>782.1<math>\pm</math>409.5</b>  | 782.5 $\pm$ 925.1   | 0.3 $\pm$ 0.2 | 0.1 $\pm$ 0.1 | 0.2 $\pm$ 0.2 |
|        |   | p       | 0.345               | <b>0.0008</b>                      | 0.303               | 0.025         | 0.584         | 0.160         |
|        | H | pre-ex  | 1725.0 $\pm$ 1829.0 | <b>464.8<math>\pm</math>176.5</b>  | 962.1 $\pm$ 1222.0  | 0.4 $\pm$ 0.2 | 0.1 $\pm$ 0.1 | 0.1 $\pm$ 0.1 |
|        |   | post-ex | 2209.0 $\pm$ 3335.0 | <b>839.5<math>\pm</math>304.9</b>  | 741.3 $\pm$ 1129.0  | 0.3 $\pm$ 0.2 | 0.2 $\pm$ 0.1 | 0.2 $\pm$ 0.1 |
|        |   | p       | 0.790               | <b>&lt; 0.0001</b>                 | 0.360               | 0.290         | 0.128         | 0.011         |
| G      | L | pre-ex  | 4194.0 $\pm$ 2171.0 | 694.0 $\pm$ 234.2                  | 40.7 $\pm$ 24.8     | 0.5 $\pm$ 0.1 | 0.3 $\pm$ 0.1 | 0.3 $\pm$ 0.1 |
|        |   | post-ex | 5094.0 $\pm$ 2277.0 | 853.5 $\pm$ 254.7                  | 20.2 $\pm$ 11.6     | 0.6 $\pm$ 0.1 | 0.4 $\pm$ 0.1 | 0.3 $\pm$ 0.1 |
|        |   | p       | 0.089               | 0.014                              | 0.002               | 0.017         | 0.007         | 0.043         |
|        | M | pre-ex  | 4280.0 $\pm$ 2270.0 | 760.9 $\pm$ 233.5                  | 45.6 $\pm$ 23.5     | 0.5 $\pm$ 0.1 | 0.3 $\pm$ 0.1 | 0.3 $\pm$ 0.1 |
|        |   | post-ex | 4780.0 $\pm$ 2100.0 | 952.2 $\pm$ 422.7                  | 29.1 $\pm$ 19.1     | 0.5 $\pm$ 0.1 | 0.3 $\pm$ 0.1 | 0.3 $\pm$ 0.1 |
|        |   | p       | 0.208               | 0.102                              | 0.008               | 0.108         | 0.160         | 0.065         |
|        | H | pre-ex  | 3993.0 $\pm$ 1851.0 | 780.2 $\pm$ 278.2                  | 35.7 $\pm$ 23.1     | 0.5 $\pm$ 0.1 | 0.3 $\pm$ 0.1 | 0.3 $\pm$ 0.1 |
|        |   | post-ex | 5417.0 $\pm$ 2937.0 | 1084.0 $\pm$ 443.3                 | 36.8 $\pm$ 38.8     | 0.5 $\pm$ 0.1 | 0.3 $\pm$ 0.1 | 0.3 $\pm$ 0.1 |
|        |   | p       | 0.009               | 0.008                              | 0.491               | 0.004         | 0.208         | 0.015         |
| B      | L | pre-ex  | 602.8 $\pm$ 664.1   | <b>732.7<math>\pm</math>259.1</b>  | 132.6 $\pm$ 56.9    | 0.2 $\pm$ 0.1 | 0.1 $\pm$ 0.0 | 0.1 $\pm$ 0.0 |
|        |   | post-ex | 582.0 $\pm$ 292.3   | <b>915.8<math>\pm</math>264.2</b>  | 123.9 $\pm$ 69.3    | 0.2 $\pm$ 0.1 | 0.1 $\pm$ 0.0 | 0.1 $\pm$ 0.0 |
|        |   | p       | 0.345               | <b>0.005</b>                       | 0.197               | 0.422         | 0.491         | 0.152         |
|        | M | pre-ex  | 775.1 $\pm$ 953.9   | <b>777.0<math>\pm</math>208.2</b>  | 152.1 $\pm$ 83.6    | 0.2 $\pm$ 0.1 | 0.1 $\pm$ 0.0 | 0.1 $\pm$ 0.0 |
|        |   | post-ex | 598.4 $\pm$ 370.2   | <b>963.6<math>\pm</math>385.9</b>  | 169.6 $\pm$ 137.9   | 0.2 $\pm$ 0.1 | 0.1 $\pm$ 0.0 | 0.1 $\pm$ 0.0 |
|        |   | p       | 0.747               | <b>0.016</b>                       | 0.406               | 0.833         | 0.663         | 0.345         |
|        | H | pre-ex  | 696.0 $\pm$ 731.7   | <b>772.2<math>\pm</math>253.1</b>  | 149.7 $\pm$ 66.2    | 0.2 $\pm$ 0.1 | 0.1 $\pm$ 0.0 | 0.1 $\pm$ 0.0 |
|        |   | post-ex | 897.3 $\pm$ 661.1   | <b>1079.0<math>\pm</math>435.5</b> | 166.2 $\pm$ 82.6    | 0.2 $\pm$ 0.1 | 0.1 $\pm$ 0.0 | 0.1 $\pm$ 0.0 |
|        |   | p       | 0.095               | <b>&lt; 0.0001</b>                 | 0.422               | 0.331         | 0.241         | 0.095         |

R - Red component; G - Green component; B - Blue component. GLN - gray level non-uniformity, RLN - run-length nonuniformity, LRE - long-run emphasis, SRE - short-run emphasis, Fraction - a fraction of image in runs, MRLN - run-length nonuniformity moment, MGLN - gray level non-uniformity moment.



**Table S11.** The left area of back musculature (ROI 3). Values (mean  $\pm$  SD) of Gray Level Run Length Matrix (GLRLM) features for three color components (R, red; G, green; B, blue) in light (L), moderate (M), and heavy (H) groups. The pre-exercise (pre-ex) and post exercise (post-ex) data series were compared. When features differed significantly ( $p < 0.05$ ) for all three groups (L, M, H), the values were marked in bold.

| Groups |   | GLN     | RLN                                 | LRE                | SRE                                 | Fraction                      | MRLN                          | MGLN                          |
|--------|---|---------|-------------------------------------|--------------------|-------------------------------------|-------------------------------|-------------------------------|-------------------------------|
| R      | L | pre-ex  | <b>7310.0<math>\pm</math>3772.0</b> | 881.4 $\pm$ 265.3  | <b>121.5<math>\pm</math>143.5</b>   | <b>0.6<math>\pm</math>0.1</b> | <b>0.3<math>\pm</math>0.1</b> | <b>0.3<math>\pm</math>0.1</b> |
|        |   | post-ex | <b>1121.0<math>\pm</math>1531.0</b> | 957.3 $\pm$ 277.1  | <b>1299.0<math>\pm</math>1191.0</b> | <b>0.3<math>\pm</math>0.2</b> | <b>0.1<math>\pm</math>0.0</b> | <b>0.1<math>\pm</math>0.1</b> |
|        |   | p       | <b>&lt; 0.0001</b>                  | 0.143              | <b>&lt; 0.0001</b>                  | <b>&lt; 0.0001</b>            | <b>&lt; 0.0001</b>            | <b>&lt; 0.0001</b>            |
|        | M | pre-ex  | <b>8421.0<math>\pm</math>4264.0</b> | 1000.0 $\pm$ 248.4 | <b>76.4<math>\pm</math>67.8</b>     | <b>0.6<math>\pm</math>0.1</b> | <b>0.3<math>\pm</math>0.1</b> | <b>0.3<math>\pm</math>0.1</b> |
|        |   | post-ex | <b>1460.0<math>\pm</math>1589.0</b> | 874.7 $\pm$ 267.1  | <b>762.2<math>\pm</math>545.4</b>   | <b>0.3<math>\pm</math>0.1</b> | <b>0.1<math>\pm</math>0.0</b> | <b>0.1<math>\pm</math>0.1</b> |
|        |   | p       | <b>&lt; 0.0001</b>                  | 0.022              | <b>&lt; 0.0001</b>                  | <b>&lt; 0.0001</b>            | <b>&lt; 0.0001</b>            | <b>&lt; 0.0001</b>            |
|        | H | pre-ex  | <b>9167.0<math>\pm</math>4049.0</b> | 980.1 $\pm$ 260.5  | <b>78.8<math>\pm</math>59.7</b>     | <b>0.6<math>\pm</math>0.1</b> | <b>0.3<math>\pm</math>0.1</b> | <b>0.3<math>\pm</math>0.1</b> |
|        |   | post-ex | <b>3648.0<math>\pm</math>4519.0</b> | 1075.0 $\pm$ 358.0 | <b>669.8<math>\pm</math>638.1</b>   | <b>0.4<math>\pm</math>0.2</b> | <b>0.1<math>\pm</math>0.1</b> | <b>0.2<math>\pm</math>0.1</b> |
|        |   | p       | <b>&lt; 0.0001</b>                  | 0.345              | <b>&lt; 0.0001</b>                  | <b>&lt; 0.0001</b>            | <b>&lt; 0.0001</b>            | <b>&lt; 0.0001</b>            |
| G      | L | pre-ex  | <b>3193.0<math>\pm</math>1419.0</b> | 1312.0 $\pm$ 388.0 | 56.3 $\pm$ 21.6                     | <b>0.4<math>\pm</math>0.1</b> | <b>0.2<math>\pm</math>0.0</b> | <b>0.2<math>\pm</math>0.0</b> |
|        |   | post-ex | <b>7833.0<math>\pm</math>2987.0</b> | 1260.0 $\pm$ 314.7 | 60.0 $\pm$ 24.5                     | <b>0.6<math>\pm</math>0.1</b> | <b>0.3<math>\pm</math>0.0</b> | <b>0.3<math>\pm</math>0.1</b> |
|        |   | p       | <b>&lt; 0.0001</b>                  | 0.527              | <b>&lt; 0.0001</b>                  | <b>&lt; 0.0001</b>            | <b>&lt; 0.0001</b>            | <b>&lt; 0.0001</b>            |
|        | M | pre-ex  | <b>3156.0<math>\pm</math>1685.0</b> | 1467.0 $\pm$ 398.9 | 72.7 $\pm$ 40.2                     | <b>0.3<math>\pm</math>0.1</b> | <b>0.2<math>\pm</math>0.0</b> | <b>0.2<math>\pm</math>0.0</b> |
|        |   | post-ex | <b>7720.0<math>\pm</math>3095.0</b> | 1180.0 $\pm$ 340.2 | 63.9 $\pm$ 26.7                     | <b>0.5<math>\pm</math>0.1</b> | <b>0.3<math>\pm</math>0.0</b> | <b>0.3<math>\pm</math>0.0</b> |
|        |   | p       | <b>&lt; 0.0001</b>                  | 0.002              | <b>&lt; 0.0001</b>                  | <b>&lt; 0.0001</b>            | <b>&lt; 0.0001</b>            | <b>&lt; 0.0001</b>            |
|        | H | pre-ex  | <b>3283.0<math>\pm</math>1598.0</b> | 1417.0 $\pm$ 417.0 | 69.6 $\pm$ 39.7                     | <b>0.4<math>\pm</math>0.1</b> | <b>0.2<math>\pm</math>0.0</b> | <b>0.2<math>\pm</math>0.0</b> |
|        |   | post-ex | <b>9175.0<math>\pm</math>3906.0</b> | 1443.0 $\pm$ 516.6 | 55.7 $\pm$ 29.1                     | <b>0.6<math>\pm</math>0.1</b> | <b>0.3<math>\pm</math>0.1</b> | <b>0.3<math>\pm</math>0.0</b> |
|        |   | p       | <b>&lt; 0.0001</b>                  | 0.422              | 0.107                               | <b>&lt; 0.0001</b>            | <b>&lt; 0.0001</b>            | <b>&lt; 0.0001</b>            |
| B      | L | pre-ex  | <b>4863.0<math>\pm</math>3582.0</b> | 1007.0 $\pm$ 295.9 | 174.5 $\pm$ 163.8                   | <b>0.5<math>\pm</math>0.2</b> | <b>0.2<math>\pm</math>0.1</b> | <b>0.2<math>\pm</math>0.1</b> |
|        |   | post-ex | <b>1306.0<math>\pm</math>693.6</b>  | 1348.0 $\pm$ 368.5 | 136.2 $\pm$ 63.8                    | <b>0.2<math>\pm</math>0.1</b> | <b>0.1<math>\pm</math>0.0</b> | <b>0.1<math>\pm</math>0.0</b> |
|        |   | p       | <b>&lt; 0.0001</b>                  | 0.125              | 0.663                               | <b>&lt; 0.0001</b>            | 0.004                         | <b>&lt; 0.0001</b>            |
|        | M | pre-ex  | <b>4988.0<math>\pm</math>3765.0</b> | 1083.0 $\pm$ 280.7 | 236.7 $\pm$ 225.3                   | <b>0.5<math>\pm</math>0.1</b> | <b>0.2<math>\pm</math>0.1</b> | <b>0.2<math>\pm</math>0.1</b> |
|        |   | post-ex | <b>1293.0<math>\pm</math>787.8</b>  | 1269.0 $\pm$ 384.4 | 169.1 $\pm$ 70.3                    | <b>0.2<math>\pm</math>0.1</b> | <b>0.1<math>\pm</math>0.0</b> | <b>0.1<math>\pm</math>0.0</b> |
|        |   | p       | <b>&lt; 0.0001</b>                  | 0.065              | 0.500                               | <b>&lt; 0.0001</b>            | <b>&lt; 0.0001</b>            | <b>&lt; 0.0001</b>            |
|        | H | pre-ex  | <b>5636.0<math>\pm</math>4280.0</b> | 1054.0 $\pm$ 300.0 | 235.9 $\pm$ 250.7                   | <b>0.5<math>\pm</math>0.2</b> | <b>0.2<math>\pm</math>0.1</b> | <b>0.3<math>\pm</math>0.1</b> |
|        |   | post-ex | <b>2094.0<math>\pm</math>1954.0</b> | 1485.0 $\pm$ 489.1 | 175.5 $\pm$ 141.2                   | <b>0.2<math>\pm</math>0.1</b> | <b>0.2<math>\pm</math>0.0</b> | <b>0.1<math>\pm</math>0.0</b> |
|        |   | p       | <b>0.004</b>                        | 0.0004             | 0.406                               | <b>&lt; 0.0001</b>            | <b>0.003</b>                  | <b>&lt; 0.0001</b>            |

R - Red component; G - Green component; B - Blue component. GLN - gray level non-uniformity, RLN - run-length nonuniformity, LRE - long-run emphasis, SRE - short-run emphasis, Fraction - a fraction of image in runs, MRLN - run-length nonuniformity moment, MGLN - gray level non-uniformity moment.

**Table S12.** The right area of back musculature (ROI 4). Values (mean  $\pm$  SD) of Gray Level Run Length Matrix (GLRLM) features for three color components (R, red; G, green; B, blue) in light (L), moderate (M), and heavy (H) groups. The pre-exercise (pre-ex) and post exercise (post-ex) data series were compared. When features differed significantly ( $p < 0.05$ ) for all three groups (L, M, H), the values were marked in bold.

| Groups |   | GLN     | RLN                                 | LRE                | SRE                                | Fraction                      | MRLN                          | MGLN                          |
|--------|---|---------|-------------------------------------|--------------------|------------------------------------|-------------------------------|-------------------------------|-------------------------------|
| R      | L | pre-ex  | <b>6726.0<math>\pm</math>4201.0</b> | 818.0 $\pm$ 276.6  | <b>87.8<math>\pm</math>58.0</b>    | <b>0.5<math>\pm</math>0.1</b> | <b>0.3<math>\pm</math>0.1</b> | <b>0.3<math>\pm</math>0.1</b> |
|        |   | post-ex | <b>1307.0<math>\pm</math>2158.0</b> | 773.8 $\pm$ 243.8  | <b>958.4<math>\pm</math>814.0</b>  | <b>0.3<math>\pm</math>0.1</b> | <b>0.1<math>\pm</math>0.1</b> | <b>0.1<math>\pm</math>0.1</b> |
|        |   | p       | <b>&lt; 0.0001</b>                  | 0.989              | <b>&lt; 0.0001</b>                 | <b>&lt; 0.0001</b>            | <b>&lt; 0.0001</b>            | <b>&lt; 0.0001</b>            |
|        | M | pre-ex  | <b>7729.0<math>\pm</math>3900.0</b> | 875.4 $\pm$ 176.5  | <b>98.3<math>\pm</math>124.7</b>   | <b>0.6<math>\pm</math>0.1</b> | <b>0.3<math>\pm</math>0.1</b> | <b>0.3<math>\pm</math>0.1</b> |
|        |   | post-ex | <b>1389.0<math>\pm</math>1213.0</b> | 759.0 $\pm$ 288.3  | <b>731.3<math>\pm</math>458.9</b>  | <b>0.4<math>\pm</math>0.1</b> | <b>0.1<math>\pm</math>0.0</b> | <b>0.1<math>\pm</math>0.1</b> |
|        |   | p       | <b>&lt; 0.0001</b>                  | 0.065              | <b>&lt; 0.0001</b>                 | <b>&lt; 0.0001</b>            | <b>&lt; 0.0001</b>            | <b>&lt; 0.0001</b>            |
|        | H | pre-ex  | <b>7908.0<math>\pm</math>3006.0</b> | 836.8 $\pm$ 232.6  | <b>53.6<math>\pm</math>31.4</b>    | <b>0.6<math>\pm</math>0.1</b> | <b>0.3<math>\pm</math>0.1</b> | <b>0.3<math>\pm</math>0.1</b> |
|        |   | post-ex | <b>2177.0<math>\pm</math>3156.0</b> | 836.8 $\pm$ 366.4  | <b>911.9<math>\pm</math>1121.0</b> | <b>0.4<math>\pm</math>0.2</b> | <b>0.1<math>\pm</math>0.1</b> | <b>0.2<math>\pm</math>0.1</b> |
|        |   | p       | <b>&lt; 0.0001</b>                  | 0.456              | <b>&lt; 0.0001</b>                 | <b>&lt; 0.0001</b>            | <b>&lt; 0.0001</b>            | <b>&lt; 0.0001</b>            |
| G      | L | pre-ex  | <b>2750.0<math>\pm</math>1808.0</b> | 1180.0 $\pm$ 397.3 | 73.0 $\pm$ 56.8                    | <b>0.3<math>\pm</math>0.1</b> | <b>0.2<math>\pm</math>0.1</b> | <b>0.2<math>\pm</math>0.0</b> |
|        |   | post-ex | <b>7344.0<math>\pm</math>3204.0</b> | 1121.0 $\pm$ 361.1 | 56.9 $\pm$ 28.4                    | <b>0.6<math>\pm</math>0.1</b> | <b>0.3<math>\pm</math>0.1</b> | <b>0.3<math>\pm</math>0.1</b> |
|        |   | p       | <b>&lt; 0.0001</b>                  | 0.456              | 0.208                              | <b>&lt; 0.0001</b>            | <b>&lt; 0.0001</b>            | <b>&lt; 0.0001</b>            |
|        | M | pre-ex  | <b>2797.0<math>\pm</math>1457.0</b> | 1279.0 $\pm$ 320.8 | 68.8 $\pm$ 35.3                    | <b>0.3<math>\pm</math>0.1</b> | <b>0.2<math>\pm</math>0.0</b> | <b>0.2<math>\pm</math>0.0</b> |
|        |   | post-ex | <b>7198.0<math>\pm</math>2698.0</b> | 1099.0 $\pm$ 298.3 | 56.2 $\pm$ 28.3                    | <b>0.6<math>\pm</math>0.1</b> | <b>0.3<math>\pm</math>0.0</b> | <b>0.3<math>\pm</math>0.0</b> |
|        |   | p       | <b>&lt; 0.0001</b>                  | 0.013              | 0.500                              | <b>&lt; 0.0001</b>            | <b>&lt; 0.0001</b>            | <b>&lt; 0.0001</b>            |
|        | H | pre-ex  | <b>2438.0<math>\pm</math>1288.0</b> | 1216.0 $\pm$ 385.6 | 70.9 $\pm$ 45.7                    | <b>0.3<math>\pm</math>0.1</b> | <b>0.2<math>\pm</math>0.0</b> | <b>0.2<math>\pm</math>0.0</b> |
|        |   | post-ex | <b>7663.0<math>\pm</math>3126.0</b> | 1204.0 $\pm$ 408.1 | 51.4 $\pm$ 27.7                    | <b>0.6<math>\pm</math>0.0</b> | <b>0.3<math>\pm</math>0.1</b> | <b>0.3<math>\pm</math>0.0</b> |
|        |   | p       | <b>&lt; 0.0001</b>                  | 0.491              | 0.074                              | <b>&lt; 0.0001</b>            | <b>&lt; 0.0001</b>            | <b>&lt; 0.0001</b>            |
| B      | L | pre-ex  | <b>4438.0<math>\pm</math>3238.0</b> | 886.8 $\pm$ 313.4  | 276.3 $\pm$ 447.4                  | <b>0.5<math>\pm</math>0.2</b> | <b>0.2<math>\pm</math>0.1</b> | <b>0.2<math>\pm</math>0.1</b> |
|        |   | post-ex | <b>1235.0<math>\pm</math>916.4</b>  | 1206.0 $\pm$ 377.2 | 154.6 $\pm$ 101.4                  | <b>0.2<math>\pm</math>0.1</b> | <b>0.1<math>\pm</math>0.0</b> | <b>0.1<math>\pm</math>0.0</b> |
|        |   | p       | <b>&lt; 0.0001</b>                  | 0.002              | 0.899                              | <b>&lt; 0.0001</b>            | <b>&lt; 0.0001</b>            | <b>&lt; 0.0001</b>            |
|        | M | pre-ex  | <b>5330.0<math>\pm</math>3686.0</b> | 971.3 $\pm$ 241.1  | 179.1 $\pm$ 206.4                  | <b>0.5<math>\pm</math>0.2</b> | <b>0.2<math>\pm</math>0.1</b> | <b>0.3<math>\pm</math>0.1</b> |
|        |   | post-ex | <b>1182.0<math>\pm</math>643.4</b>  | 1171.0 $\pm$ 351.4 | 147.5 $\pm$ 81.0                   | <b>0.2<math>\pm</math>0.1</b> | <b>0.1<math>\pm</math>0.0</b> | <b>0.1<math>\pm</math>0.0</b> |
|        |   | p       | <b>&lt; 0.0001</b>                  | 0.065              | 0.406                              | <b>&lt; 0.0001</b>            | <b>&lt; 0.0001</b>            | <b>&lt; 0.0001</b>            |
|        | H | pre-ex  | <b>5218.0<math>\pm</math>3557.0</b> | 880.7 $\pm$ 259.2  | 200.9 $\pm$ 259.0                  | <b>0.5<math>\pm</math>0.1</b> | <b>0.2<math>\pm</math>0.1</b> | <b>0.3<math>\pm</math>0.1</b> |
|        |   | post-ex | <b>1606.0<math>\pm</math>1458.0</b> | 1247.0 $\pm$ 408.0 | 121.0 $\pm$ 63.7                   | <b>0.2<math>\pm</math>0.1</b> | <b>0.2<math>\pm</math>0.0</b> | <b>0.1<math>\pm</math>0.0</b> |
|        |   | p       | <b>&lt; 0.0001</b>                  | 0.0006             | 0.527                              | <b>&lt; 0.0001</b>            | <b>0.001</b>                  | <b>&lt; 0.0001</b>            |

R - Red component; G - Green component; B - Blue component. GLN - gray level non-uniformity, RLN - run-length nonuniformity, LRE - long-run emphasis, SRE - short-run emphasis, Fraction - a fraction of image in runs, MRLN - run-length nonuniformity moment, MGLN - gray level non-uniformity moment.

**Table S13.** The withers area (ROI 1). Values (mean  $\pm$  SD) of Gray Level Co-occurrence Matrix (GLCM) features for three color components (R, red; G, green; B, blue) in light (L), moderate (M), and heavy (H) groups. The pre-exercise (pre-ex) and post exercise (post-ex) data series were compared. When features differed significantly ( $p < 0.05$ ) for all three groups (L, M, H), the values were marked in bold.

| Groups |         | AngScMom | Contrast | Correlat | SumOfSqs  | InvDfMom  | SumAverg  | SumVarnc  | SumEntrp    | Entropy   | DifVarnc | DifEntrp |          |         |
|--------|---------|----------|----------|----------|-----------|-----------|-----------|-----------|-------------|-----------|----------|----------|----------|---------|
| R      | L       | pre-ex   | 0.1±0.1  | 0.6±0.4  | 1.0±0.0   | 48.7±38.3 | 0.8±0.1   | 52.2±8.6  | 194.0±153.0 | 1.3±0.3   | 1.4±0.4  | 0.4±0.3  | 0.3±0.1  |         |
|        |         | post-ex  | 0.5±0.1  | 0.2±0.2  | 1.0±0.0   | 8.5±10.0  | 0.9±0.0   | 61.9±1.6  | 33.7±39.8   | 0.6±0.2   | 0.6±0.3  | 0.1±0.1  | 0.1±0.1  |         |
|        |         | p        | < 0.0001 | < 0.0001 | < 0.0001  | < 0.0001  | < 0.0001  | < 0.0001  | < 0.0001    | < 0.0001  | < 0.0001 | < 0.0001 | < 0.0001 |         |
|        | M       | pre-ex   | 0.1±0.1  | 0.7±0.5  | 1.0±0.0   | 56.9±41.5 | 0.8±0.1   | 50.9±8.3  | 226.8±165.6 | 1.3±0.3   | 1.5±0.4  | 0.5±0.3  | 0.3±0.1  |         |
|        |         | post-ex  | 0.4±0.1  | 0.2±0.2  | 1.0±0.0   | 15.5±17.7 | 0.9±0.0   | 60.4±3.0  | 61.8±70.7   | 0.7±0.3   | 0.8±0.3  | 0.2±0.2  | 0.2±0.1  |         |
|        |         | p        | < 0.0001 | < 0.0001 | 0.0004    | < 0.0001  | < 0.0001  | < 0.0001  | < 0.0001    | < 0.0001  | < 0.0001 | 0.0003   | < 0.0001 |         |
|        | H       | pre-ex   | 0.1±0.1  | 0.8±0.4  | 1.0±0.0   | 62.8±39.2 | 0.8±0.1   | 49.0±7.4  | 250.6±156.4 | 1.4±0.2   | 1.6±0.3  | 0.5±0.2  | 0.4±0.1  |         |
|        |         | post-ex  | 0.2±0.1  | 0.4±0.4  | 1.0±0.0   | 33.3±37.7 | 0.9±0.1   | 57.2±6.0  | 132.6±150.6 | 1.0±0.3   | 1.1±0.4  | 0.3±0.3  | 0.3±0.1  |         |
|        |         | p        | < 0.0001 | < 0.0001 | 0.151     | 0.007     | < 0.0001  | < 0.0001  | 0.007       | < 0.0001  | < 0.0001 | 0.0006   | < 0.0001 |         |
|        | L       | pre-ex   | 0.1±0.0  | 0.4±0.2  | 1.0±0.0   | 25.3±16.9 | 0.8±0.0   | 45.1±3.9  | 100.6±67.6  | 1.3±0.2   | 1.4±0.2  | 0.3±0.1  | 0.3±0.1  |         |
|        |         | post-ex  | 0.1±0.0  | 0.7±0.2  | 1.0±0.0   | 61.1±14.2 | 0.8±0.0   | 29.3±6.0  | 243.5±56.5  | 1.5±0.1   | 1.7±0.1  | 0.5±0.1  | 0.4±0.0  |         |
|        |         | p        | 0.005    | < 0.0001 | < 0.0001  | < 0.0001  | < 0.0001  | < 0.0001  | < 0.0001    | < 0.0001  | < 0.0001 | < 0.0001 | < 0.0001 |         |
| G      | M       | pre-ex   | 0.1±0.1  | 0.4±0.2  | 1.0±0.0   | 23.1±15.5 | 0.8±0.0   | 45.6±3.7  | 92.2±61.8   | 1.3±0.2   | 1.4±0.2  | 0.3±0.1  | 0.3±0.1  |         |
|        |         | post-ex  | 0.1±0.0  | 0.7±0.2  | 1.0±0.0   | 62.5±12.5 | 0.8±0.0   | 31.3±7.2  | 249.1±50.0  | 1.5±0.1   | 1.6±0.1  | 0.5±0.1  | 0.4±0.0  |         |
|        |         | p        | 0.004    | < 0.0001 | < 0.0001  | < 0.0001  | < 0.0001  | < 0.0001  | < 0.0001    | < 0.0001  | < 0.0001 | < 0.0001 | < 0.0001 |         |
|        | H       | pre-ex   | 0.1±0.0  | 0.4±0.2  | 1.0±0.0   | 21.3±12.4 | 0.9±0.0   | 46.4±2.5  | 84.9±49.4   | 1.2±0.1   | 1.3±0.2  | 0.3±0.1  | 0.3±0.0  |         |
|        |         | post-ex  | 0.1±0.0  | 0.7±0.2  | 1.0±0.0   | 61.5±17.2 | 0.8±0.0   | 37.1±5.1  | 245.3±68.7  | 1.4±0.1   | 1.6±0.1  | 0.5±0.1  | 0.4±0.0  |         |
|        |         | p        | < 0.0001 | < 0.0001 | < 0.0001  | < 0.0001  | < 0.0001  | < 0.0001  | < 0.0001    | < 0.0001  | < 0.0001 | < 0.0001 | < 0.0001 |         |
|        | L       | pre-ex   | 0.2±0.1  | 0.4±0.3  | 1.0±0.0   | 16.4±20.2 | 0.9±0.1   | 6.8±3.2   | 65.3±80.5   | 0.9±0.2   | 1.0±0.3  | 0.3±0.2  | 0.2±0.1  |         |
|        |         | post-ex  | 0.1±0.0  | 0.2±0.1  | 1.0±0.0   | 8.2±2.7   | 0.9±0.0   | 10.1±1.9  | 32.5±10.9   | 1.2±0.1   | 1.2±0.1  | 0.2±0.1  | 0.2±0.0  |         |
|        |         | p        | < 0.0001 | < 0.0001 | 0.394     | 0.197     | 0.509     | < 0.0001  | 0.197       | < 0.0001  | 0.003    | 0.095    | 0.197    |         |
|        | B       | M        | pre-ex   | 0.2±0.1  | 0.4±0.5   | 1.0±0.0   | 19.5±24.8 | 0.9±0.1   | 7.1±3.7     | 77.5±98.9 | 0.9±0.2  | 1.0±0.3  | 0.3±0.3  | 0.2±0.1 |
|        |         |          | post-ex  | 0.1±0.0  | 0.2±0.1   | 1.0±0.0   | 9.9±3.9   | 0.9±0.0   | 9.8±2.4     | 39.3±15.7 | 1.2±0.1  | 1.2±0.1  | 0.2±0.1  | 0.2±0.0 |
|        |         |          | p        | < 0.0001 | 0.107     | 0.194     | 0.143     | 0.989     | 0.0008      | 0.143     | 0.0001   | 0.004    | 0.056    | 0.456   |
| H      | pre-ex  | 0.3±0.1  | 0.5±0.4  | 1.0±0.0  | 22.2±22.5 | 0.9±0.1   | 7.1±3.4   | 88.1±89.5 | 0.9±0.2     | 1.0±0.3   | 0.4±0.3  | 0.3±0.1  |          |         |
|        | post-ex | 0.1±0.0  | 0.3±0.3  | 1.0±0.0  | 14.8±12.3 | 0.9±0.0   | 8.5±1.8   | 58.7±49.1 | 1.1±0.1     | 1.2±0.1   | 0.3±0.2  | 0.2±0.1  |          |         |
|        | p       | < 0.0001 | 0.105    | 0.705    | 0.375     | 0.944     | 0.0009    | 0.375     | 0.0002      | 0.005     | 0.054    | 0.527    |          |         |

R - Red component; G - Green component; B - Blue component. AngScMom - angular second moment/energy; Correlat - correlation; SumOfSqs - sum of squares; InvDefMom - inverse different moment/homogeneity; SumAverg - summation mean; SumVarnc - summation variance; SumEntrp - summation entropy; DifVarnc - differential variance; DifEntrp - differential entropy; p - the level of marginal significance; SD - standard deviation.

**Table S14.** The thoracic spine area (ROI 2). Values (mean  $\pm$  SD) of Gray Level Co-occurrence Matrix (GLCM) features for three color components (R, red; G, green; B, blue) in light (L), moderate (M), and heavy (H) groups. The pre-exercise (pre-ex) and post exercise (post-ex) data series were compared. When features differed significantly ( $p < 0.05$ ) for all three groups (L, M, H), the values were marked in bold.

| Groups |   | AngScMom | Contrast | Correlat | SumOfSqs | InvDfMom  | SumAverg  | SumVarnc | SumEntrp   | Entropy    | DifVarnc | DifEntrp |         |         |
|--------|---|----------|----------|----------|----------|-----------|-----------|----------|------------|------------|----------|----------|---------|---------|
| R      | L | pre-ex   | 0.6±0.2  | 0.2±0.2  | 1.0±0.0  | 12.5±20.9 | 1.0±0.0   | 61.4±3.4 | 49.8±83.2  | 0.5±0.3    | 0.6±0.4  | 0.1±0.2  | 0.1±0.1 |         |
|        |   | post-ex  | 0.6±0.2  | 0.1±0.1  | 1.0±0.0  | 3.3±4.9   | 1.0±0.0   | 62.5±1.6 | 13.3±19.5  | 0.5±0.3    | 0.5±0.3  | 0.1±0.1  | 0.1±0.1 |         |
|        |   | p        | >0.999   | 0.375    | 0.043    | 0.049     | 0.128     | 0.360    | 0.049      | >0.999     | 0.944    | 0.375    | 0.406   |         |
|        | M | pre-ex   | 0.5±0.2  | 0.2±0.3  | 1.0±0.0  | 19.2±28.7 | 0.9±0.0   | 60.5±3.7 | 76.4±114.5 | 0.6±0.3    | 0.7±0.4  | 0.2±0.2  | 0.2±0.1 |         |
|        |   | post-ex  | 0.4±0.2  | 0.2±0.2  | 1.0±0.0  | 7.0±9.1   | 0.9±0.1   | 61.2±2.9 | 28.0±36.4  | 0.7±0.4    | 0.7±0.4  | 0.1±0.1  | 0.2±0.1 |         |
|        |   | p        | 0.422    | 0.375    | 0.264    | 0.039     | 0.747     | 0.527    | 0.049      | 0.643      | 0.663    | 0.331    | 0.504   |         |
|        | H | pre-ex   | 0.5±0.2  | 0.2±0.2  | 1.0±0.0  | 18.5±26.0 | 0.9±0.0   | 60.5±3.5 | 73.8±104.0 | 0.7±0.3    | 0.7±0.4  | 0.2±0.2  | 0.2±0.1 |         |
|        |   | post-ex  | 0.4±0.3  | 0.2±0.3  | 1.0±0.0  | 12.4±16.9 | 0.9±0.1   | 60.2±3.9 | 49.3±67.3  | 0.8±0.4    | 0.8±0.5  | 0.2±0.2  | 0.2±0.1 |         |
|        |   | p        | 0.107    | 0.989    | 0.056    | 0.277     | 0.473     | 0.922    | 0.277      | 0.290      | 0.750    | 0.944    | 0.584   |         |
|        | G | L        | pre-ex   | 0.1±0.0  | 0.4±0.2  | 1.0±0.0   | 57.0±13.7 | 0.8±0.0  | 29.6±6.0   | 227.5±55.0 | 1.5±0.1  | 1.6±0.1  | 0.3±0.1 | 0.3±0.0 |
|        |   |          | post-ex  | 0.0±0.0  | 0.6±0.2  | 1.0±0.0   | 38.7±10.1 | 0.8±0.0  | 36.0±6.4   | 154.3±40.3 | 1.5±0.1  | 1.7±0.1  | 0.4±0.1 | 0.4±0.0 |
|        |   |          | p        | 0.094    | 0.002    | < 0.0001  | < 0.0001  | 0.004    | 0.0003     | < 0.0001   | 0.345    | 0.101    | 0.0008  | 0.002   |
| M      |   | pre-ex   | 0.1±0.0  | 0.4±0.2  | 1.0±0.0  | 56.9±15.8 | 0.8±0.0   | 31.4±6.5 | 227.4±63.4 | 1.5±0.1    | 1.6±0.1  | 0.3±0.1  | 0.3±0.1 |         |
|        |   | post-ex  | 0.1±0.1  | 0.5±0.2  | 1.0±0.0  | 38.5±14.8 | 0.8±0.0   | 38.0±7.9 | 153.3±59.3 | 1.4±0.2    | 1.6±0.2  | 0.4±0.1  | 0.3±0.0 |         |
|        |   | p        | 0.726    | 0.004    | < 0.0001 | < 0.0001  | 0.079     | < 0.0001 | < 0.0001   | 0.264      | 0.726    | 0.0006   | 0.005   |         |
| H      |   | pre-ex   | 0.1±0.0  | 0.4±0.1  | 1.0±0.0  | 49.8±15.8 | 0.8±0.0   | 33.3±7.4 | 198.6±63.1 | 1.5±0.1    | 1.6±0.1  | 0.3±0.1  | 0.3±0.0 |         |
|        |   | post-ex  | 0.1±0.1  | 0.5±0.2  | 1.0±0.0  | 35.2±11.8 | 0.8±0.0   | 39.1±8.3 | 140.3±47.1 | 1.4±0.2    | 1.6±0.2  | 0.4±0.1  | 0.3±0.1 |         |
|        |   | p        | 0.053    | 0.004    | < 0.0001 | < 0.0001  | 0.084     | < 0.0001 | < 0.0001   | 0.019      | 0.264    | 0.001    | 0.006   |         |
| B      |   | L        | pre-ex   | 0.1±0.0  | 0.2±0.2  | 1.0±0.0   | 6.9±4.5   | 0.9±0.0  | 9.6±1.7    | 27.3±17.8  | 1.1±0.1  | 1.1±0.1  | 0.1±0.1 | 0.2±0.0 |
|        |   |          | post-ex  | 0.1±0.1  | 0.1±0.0  | 1.0±0.0   | 4.0±1.5   | 0.9±0.0  | 7.6±1.9    | 15.8±6.2   | 1.0±0.1  | 1.0±0.1  | 0.1±0.0 | 0.2±0.0 |
|        |   |          | p        | 0.004    | 0.290    | < 0.0001  | < 0.0001  | 0.169    | 0.0003     | < 0.0001   | 0.010    | 0.013    | 0.360   | 0.208   |
|        | M | pre-ex   | 0.1±0.0  | 0.2±0.2  | 1.0±0.0  | 9.2±9.9   | 0.9±0.0   | 9.4±2.0  | 36.7±39.2  | 1.1±0.1    | 1.1±0.1  | 0.2±0.2  | 0.2±0.1 |         |
|        |   | post-ex  | 0.2±0.1  | 0.1±0.0  | 1.0±0.0  | 4.1±1.8   | 0.9±0.0   | 7.0±2.4  | 16.5±7.0   | 0.9±0.1    | 1.0±0.1  | 0.1±0.0  | 0.2±0.0 |         |
|        |   | p        | < 0.0001 | 0.160    | 0.0003   | < 0.0001  | 0.944     | < 0.0001 | < 0.0001   | < 0.0001   | < 0.0001 | 0.623    | 0.197   |         |
|        | H | pre-ex   | 0.1±0.0  | 0.2±0.2  | 1.0±0.0  | 8.2±8.8   | 0.9±0.0   | 8.7±2.3  | 32.6±34.9  | 1.0±0.1    | 1.1±0.1  | 0.2±0.1  | 0.2±0.0 |         |
|        |   | post-ex  | 0.2±0.1  | 0.2±0.1  | 1.0±0.0  | 5.0±3.4   | 0.9±0.0   | 6.8±2.5  | 19.9±13.6  | 0.9±0.1    | 1.0±0.1  | 0.2±0.1  | 0.2±0.0 |         |
|        |   | p        | 0.0003   | 0.726    | 0.003    | 0.016     | 0.208     | 0.003    | 0.018      | 0.001      | 0.002    | 0.833    | 0.375   |         |

R - Red component; G - Green component; B - Blue component. AngScMom - angular second moment/energy; Correlat - correlation; SumOfSqs - sum of squares; InvDefMom - inverse different moment/homogeneity; SumAverg - summation mean; SumVarnc - summation variance; SumEntrp - summation entropy; DifVarnc - differential variance; DifEntrp - differential entropy; p - the level of marginal significance; SD - standard deviation.

**Table S15.** The left area of back musculature (ROI 3). Values (mean  $\pm$  SD) of Gray Level Co-occurrence Matrix (GLCM) features for three color components (R, red; G, green; B, blue) in light (L), moderate (M), and heavy (H) groups. The pre-exercise (pre-ex) and post exercise (post-ex) data series were compared. When features differed significantly ( $p < 0.05$ ) for all three groups (L, M, H), the values were marked in bold.

| Groups |   | AngScMom | Contrast | Correlat | SumOfSqs | InvDfMom   | SumAverg | SumVarnc  | SumEntrp    | Entropy  | DifVarnc | DifEntrp |          |
|--------|---|----------|----------|----------|----------|------------|----------|-----------|-------------|----------|----------|----------|----------|
| R      | L | pre-ex   | 0.1±0.1  | 0.5±0.2  | 1.0±0.0  | 101.8±51.6 | 0.8±0.0  | 41.2±11.9 | 406.7±206.4 | 1.4±0.2  | 1.5±0.3  | 0.3±0.1  | 0.3±0.1  |
|        |   | post-ex  | 0.4±0.1  | 0.1±0.1  | 1.0±0.0  | 11.1±16.0  | 1.0±0.0  | 61.4±2.3  | 44.3±64.1   | 0.6±0.2  | 0.6±0.3  | 0.1±0.1  | 0.1±0.1  |
|        |   | p        | < 0.0001 | < 0.0001 | < 0.0001 | < 0.0001   | < 0.0001 | < 0.0001  | < 0.0001    | < 0.0001 | < 0.0001 | < 0.0001 | < 0.0001 |
|        | M | pre-ex   | 0.1±0.0  | 0.5±0.2  | 1.0±0.0  | 96.5±42.3  | 0.8±0.0  | 42.1±9.4  | 385.7±169.0 | 1.5±0.2  | 1.6±0.2  | 0.3±0.2  | 0.3±0.1  |
|        |   | post-ex  | 0.4±0.1  | 0.1±0.1  | 1.0±0.0  | 12.8±16.1  | 1.0±0.0  | 61.0±2.0  | 51.0±64.2   | 0.7±0.2  | 0.7±0.2  | 0.1±0.1  | 0.1±0.1  |
|        |   | p        | < 0.0001 | < 0.0001 | < 0.0001 | < 0.0001   | < 0.0001 | < 0.0001  | < 0.0001    | < 0.0001 | < 0.0001 | < 0.0001 | < 0.0001 |
|        | H | pre-ex   | 0.1±0.0  | 0.5±0.2  | 1.0±0.0  | 95.6±41.4  | 0.8±0.0  | 41.0±11.1 | 381.9±165.4 | 1.5±0.1  | 1.6±0.2  | 0.4±0.2  | 0.3±0.1  |
|        |   | post-ex  | 0.3±0.1  | 0.2±0.2  | 1.0±0.0  | 25.0±31.6  | 0.9±0.1  | 59.2±3.9  | 99.6±126.1  | 0.8±0.3  | 0.9±0.3  | 0.2±0.2  | 0.2±0.1  |
|        |   | p        | < 0.0001 | < 0.0001 | 0.002    | < 0.0001   | < 0.0001 | < 0.0001  | < 0.0001    | < 0.0001 | < 0.0001 | < 0.0001 | < 0.0001 |
|        | L | pre-ex   | 0.1±0.0  | 0.3±0.1  | 1.0±0.0  | 26.0±11.1  | 0.9±0.0  | 43.9±2.9  | 103.9±44.4  | 1.3±0.1  | 1.4±0.1  | 0.2±0.1  | 0.3±0.0  |
|        |   | post-ex  | 0.1±0.0  | 0.5±0.1  | 1.0±0.0  | 62.4±13.9  | 0.8±0.0  | 27.2±6.9  | 248.9±55.6  | 1.4±0.1  | 1.5±0.1  | 0.3±0.1  | 0.3±0.0  |
|        |   | p        | 0.406    | < 0.0001 | 0.001    | < 0.0001   | < 0.0001 | < 0.0001  | < 0.0001    | 0.004    | 0.0004   | < 0.0001 | < 0.0001 |
| G      | M | pre-ex   | 0.1±0.0  | 0.3±0.1  | 1.0±0.0  | 22.4±9.7   | 0.9±0.0  | 45.3±2.9  | 89.2±38.8   | 1.3±0.1  | 1.4±0.2  | 0.2±0.1  | 0.2±0.0  |
|        |   | post-ex  | 0.1±0.0  | 0.5±0.1  | 1.0±0.0  | 73.4±8.8   | 0.8±0.0  | 30.6±4.4  | 293.1±35.3  | 1.4±0.1  | 1.6±0.1  | 0.3±0.1  | 0.3±0.0  |
|        |   | p        | 0.020    | < 0.0001 | < 0.0001 | < 0.0001   | < 0.0001 | < 0.0001  | < 0.0001    | < 0.0001 | < 0.0001 | < 0.0001 | < 0.0001 |
|        | H | pre-ex   | 0.1±0.0  | 0.3±0.1  | 1.0±0.0  | 23.8±9.2   | 0.9±0.0  | 44.8±3.1  | 94.9±36.9   | 1.3±0.1  | 1.4±0.1  | 0.2±0.1  | 0.2±0.0  |
|        |   | post-ex  | 0.1±0.0  | 0.5±0.1  | 1.0±0.0  | 63.7±15.7  | 0.8±0.0  | 31.8±7.6  | 254.4±62.9  | 1.4±0.1  | 1.6±0.1  | 0.4±0.1  | 0.3±0.0  |
|        |   | p        | 0.197    | < 0.0001 | < 0.0001 | < 0.0001   | < 0.0001 | < 0.0001  | < 0.0001    | < 0.0001 | < 0.0001 | < 0.0001 | < 0.0001 |
|        | L | pre-ex   | 0.2±0.1  | 0.4±0.2  | 1.0±0.0  | 58.7±43.6  | 0.9±0.1  | 13.4±7.5  | 234.5±174.4 | 1.2±0.3  | 1.3±0.3  | 0.3±0.2  | 0.3±0.1  |
|        |   | post-ex  | 0.1±0.0  | 0.2±0.0  | 1.0±0.0  | 9.1±2.6    | 0.9±0.0  | 11.1±2.5  | 36.3±10.5   | 1.2±0.1  | 1.2±0.1  | 0.1±0.0  | 0.2±0.0  |
|        |   | p        | < 0.0001 | < 0.0001 | 0.004    | 0.001      | 0.0004   | 0.500     | < 0.0001    | 0.241    | 0.121    | 0.0004   | 0.010    |
|        | M | pre-ex   | 0.2±0.1  | 0.4±0.3  | 1.0±0.0  | 45.6±37.4  | 0.9±0.1  | 11.1±6.3  | 182.2±149.3 | 1.1±0.3  | 1.2±0.3  | 0.3±0.2  | 0.3±0.1  |
|        |   | post-ex  | 0.1±0.0  | 0.2±0.1  | 1.0±0.0  | 10.2±3.0   | 0.9±0.0  | 9.8±1.3   | 40.8±11.9   | 1.1±0.0  | 1.2±0.1  | 0.1±0.1  | 0.2±0.0  |
|        |   | p        | < 0.0001 | < 0.0001 | 0.126    | < 0.0001   | < 0.0001 | 0.422     | < 0.0001    | 0.623    | >0.999   | 0.0002   | < 0.0001 |
| B      | H | pre-ex   | 0.2±0.1  | 0.4±0.3  | 1.0±0.0  | 52.0±43.0  | 0.9±0.1  | 12.4±7.8  | 207.6±171.6 | 1.1±0.3  | 1.2±0.3  | 0.3±0.2  | 0.3±0.1  |
|        |   | post-ex  | 0.1±0.0  | 0.2±0.1  | 1.0±0.0  | 12.7±9.8   | 0.9±0.0  | 9.9±2.6   | 50.4±39.1   | 1.1±0.1  | 1.2±0.1  | 0.2±0.1  | 0.2±0.1  |
|        |   | p        | 0.0004   | 0.020    | 0.094    | < 0.0001   | 0.001    | 0.833     | 0.001       | 0.979    | 0.491    | 0.0008   | 0.004    |

R - Red component; G - Green component; B - Blue component. AngScMom - angular second moment/energy; Correlat - correlation; SumOfSqs - sum of squares; InvDefMom - inverse different moment/homogeneity; SumAverg - summation mean; SumVarnc - summation variance; SumEntrp - summation entropy; DifVarnc - differential variance; DifEntrp - differential entropy; p - the level of marginal significance; SD - standard deviation.

**Table S16.** The right area of back musculature (ROI 4). Values (mean  $\pm$  SD) of Gray Level Co-occurrence Matrix (GLCM) features for three color components (R, red; G, green; B, blue) in light (L), moderate (M), and heavy (H) groups. The pre-exercise (pre-ex) and post exercise (post-ex) data series were compared. When features differed significantly ( $p < 0.05$ ) for all three groups (L, M, H), the values were marked in bold.

| Groups |   | AngScMom | Contrast | Correlat | SumOfSqs | InvDfMom   | SumAverg | SumVarnc  | SumEntrp    | Entropy  | DifVarnc | DifEntrp |          |
|--------|---|----------|----------|----------|----------|------------|----------|-----------|-------------|----------|----------|----------|----------|
| R      | L | pre-ex   | 0.1±0.1  | 0.5±0.2  | 1.0±0.0  | 100.0±47.6 | 0.8±0.1  | 40.9±11.2 | 399.3±190.2 | 1.4±0.2  | 1.6±0.3  | 0.3±0.2  | 0.3±0.1  |
|        |   | post-ex  | 0.4±0.1  | 0.1±0.2  | 1.0±0.0  | 11.1±16.5  | 1.0±0.0  | 61.3±2.6  | 44.2±65.7   | 0.6±0.2  | 0.7±0.3  | 0.1±0.1  | 0.1±0.1  |
|        |   | p        | < 0.0001 | < 0.0001 | < 0.0001 | < 0.0001   | < 0.0001 | < 0.0001  | < 0.0001    | < 0.0001 | < 0.0001 | < 0.0001 | < 0.0001 |
|        | M | pre-ex   | 0.1±0.1  | 0.5±0.2  | 1.0±0.0  | 100.4±39.9 | 0.8±0.1  | 39.3±10.5 | 401.2±159.4 | 1.5±0.2  | 1.6±0.3  | 0.4±0.1  | 0.3±0.1  |
|        |   | post-ex  | 0.4±0.1  | 0.1±0.1  | 1.0±0.0  | 15.4±13.9  | 0.9±0.0  | 60.8±1.9  | 61.5±55.3   | 0.7±0.2  | 0.7±0.2  | 0.1±0.1  | 0.1±0.1  |
|        |   | p        | < 0.0001 | < 0.0001 | < 0.0001 | < 0.0001   | < 0.0001 | < 0.0001  | < 0.0001    | < 0.0001 | < 0.0001 | < 0.0001 | < 0.0001 |
|        | H | pre-ex   | 0.1±0.0  | 0.6±0.2  | 1.0±0.0  | 102.0±39.2 | 0.8±0.0  | 38.6±9.2  | 407.5±156.7 | 1.5±0.1  | 1.7±0.2  | 0.4±0.1  | 0.3±0.1  |
|        |   | post-ex  | 0.4±0.1  | 0.2±0.2  | 1.0±0.0  | 19.7±25.2  | 0.9±0.0  | 60.3±3.2  | 78.8±100.7  | 0.7±0.3  | 0.8±0.3  | 0.2±0.1  | 0.2±0.1  |
|        |   | p        | < 0.0001 | < 0.0001 | < 0.0001 | < 0.0001   | < 0.0001 | < 0.0001  | < 0.0001    | < 0.0001 | < 0.0001 | < 0.0001 | < 0.0001 |
| G      | L | pre-ex   | 0.1±0.1  | 0.3±0.1  | 1.0±0.0  | 24.7±11.5  | 0.9±0.0  | 44.3±3.1  | 98.7±46.1   | 1.3±0.2  | 1.4±0.2  | 0.2±0.1  | 0.2±0.0  |
|        |   | post-ex  | 0.1±0.0  | 0.5±0.2  | 1.0±0.0  | 64.5±12.4  | 0.8±0.0  | 28.8±6.6  | 257.5±49.5  | 1.4±0.1  | 1.6±0.1  | 0.4±0.1  | 0.3±0.0  |
|        |   | p        | 0.527    | < 0.0001 | 0.004    | < 0.0001   | < 0.0001 | < 0.0001  | < 0.0001    | 0.0008   | < 0.0001 | < 0.0001 | < 0.0001 |
|        | M | pre-ex   | 0.1±0.0  | 0.3±0.1  | 1.0±0.0  | 22.4±12.1  | 0.9±0.0  | 44.6±3.1  | 89.5±48.4   | 1.3±0.1  | 1.4±0.1  | 0.2±0.1  | 0.2±0.0  |
|        |   | post-ex  | 0.1±0.0  | 0.5±0.1  | 1.0±0.0  | 68.8±7.8   | 0.8±0.0  | 29.7±5.6  | 274.9±31.2  | 1.4±0.1  | 1.6±0.1  | 0.3±0.1  | 0.3±0.0  |
|        |   | p        | 0.500    | < 0.0001 | < 0.0001 | < 0.0001   | < 0.0001 | < 0.0001  | < 0.0001    | < 0.0001 | < 0.0001 | < 0.0001 | < 0.0001 |
|        | H | pre-ex   | 0.1±0.1  | 0.2±0.1  | 1.0±0.0  | 20.6±8.9   | 0.9±0.0  | 45.3±3.0  | 82.0±35.5   | 1.3±0.2  | 1.3±0.2  | 0.2±0.1  | 0.2±0.0  |
|        |   | post-ex  | 0.1±0.0  | 0.5±0.1  | 1.0±0.0  | 65.1±14.9  | 0.8±0.0  | 28.6±6.5  | 259.8±59.8  | 1.4±0.1  | 1.6±0.1  | 0.4±0.1  | 0.3±0.0  |
|        |   | p        | 0.107    | < 0.0001 | 0.0006   | < 0.0001   | < 0.0001 | < 0.0001  | < 0.0001    | < 0.0001 | < 0.0001 | < 0.0001 | < 0.0001 |
| B      | L | pre-ex   | 0.2±0.1  | 0.4±0.3  | 1.0±0.0  | 55.3±40.0  | 0.9±0.1  | 12.9±7.1  | 220.6±159.8 | 1.1±0.3  | 1.3±0.3  | 0.3±0.2  | 0.3±0.1  |
|        |   | post-ex  | 0.1±0.0  | 0.2±0.1  | 1.0±0.0  | 9.1±3.0    | 0.9±0.0  | 10.4±2.2  | 36.2±12.1   | 1.2±0.1  | 1.2±0.1  | 0.1±0.1  | 0.2±0.0  |
|        |   | p        | 0.001    | < 0.0001 | 0.019    | < 0.0001   | 0.001    | 0.252     | < 0.0001    | 0.241    | 0.360    | < 0.0001 | 0.0008   |
|        | M | pre-ex   | 0.2±0.1  | 0.4±0.3  | 1.0±0.0  | 53.4±38.0  | 0.9±0.1  | 12.8±6.8  | 213.0±151.7 | 1.2±0.2  | 1.3±0.2  | 0.3±0.2  | 0.3±0.1  |
|        |   | post-ex  | 0.1±0.0  | 0.2±0.1  | 1.0±0.0  | 10.0±3.3   | 0.9±0.0  | 10.2±2.0  | 39.9±13.0   | 1.2±0.1  | 1.2±0.1  | 0.1±0.0  | 0.2±0.0  |
|        |   | p        | < 0.0001 | < 0.0001 | 0.0006   | < 0.0001   | < 0.0001 | 0.188     | < 0.0001    | 0.833    | 0.197    | < 0.0001 | < 0.0001 |
|        | H | pre-ex   | 0.2±0.1  | 0.5±0.3  | 1.0±0.0  | 54.9±38.6  | 0.9±0.1  | 12.7±6.8  | 218.9±154.1 | 1.2±0.3  | 1.3±0.3  | 0.4±0.2  | 0.3±0.1  |
|        |   | post-ex  | 0.1±0.0  | 0.2±0.1  | 1.0±0.0  | 11.4±5.7   | 0.9±0.0  | 10.8±2.1  | 45.5±22.8   | 1.2±0.1  | 1.2±0.1  | 0.2±0.1  | 0.2±0.0  |
|        |   | p        | < 0.0001 | 0.0004   | < 0.0001 | < 0.0001   | 0.0004   | 0.406     | < 0.0001    | 0.855    | 0.208    | < 0.0001 | 0.0002   |

R - Red component; G - Green component; B - Blue component. AngScMom - angular second moment/energy; Correlat - correlation; SumOfSqs - sum of squares; InvDefMom - inverse different moment/homogeneity; SumAverg - summation mean; SumVarnc - summation variance; SumEntrp - summation entropy; DifVarnc - differential variance; DifEntrp - differential entropy; p - the level of marginal significance; SD - standard deviation.
